Generation of murine HPC<sup>LSKs</sup> for functional studies

1 **A cutting-edge approach unravels a novel role for CDK6 in leukemic progenitor cells**

2

3 Eszter Doma<sup>1</sup>, Isabella Maria Mayer<sup>1</sup>, Tania Brandstoeetter<sup>1</sup>, Barbara Maurer<sup>1</sup>, Reinhard  
4 Grausenburger<sup>1</sup>, Ingeborg Menzl<sup>1</sup>, Markus Zojer<sup>1</sup>, Andrea Hoelbl-Kovacic<sup>1</sup>, Leif Carlsson<sup>2</sup>,  
5 Gerwin Heller<sup>1,3</sup>, Karoline Kollmann<sup>1</sup>, Veronika Sexl<sup>1</sup>

6

7 <sup>1</sup>Department of Biomedical Sciences, Institute of Pharmacology and Toxicology, University of  
8 Veterinary Medicine Vienna, 1210 Vienna, Austria

9 <sup>2</sup>Umeå Center for Molecular Medicine, Umeå University, 901 87 Umeå, Sweden

10 <sup>3</sup>Medical University of Vienna, Department of Medicine I, 1090 Vienna, Austria

11

12 **Running title:** Generation murine HPC<sup>LSK</sup> wt/*Cdk6*<sup>-/-</sup> cell lines

13

14 **Corresponding author:**

15 Univ.-Prof. Dr.med.univ. Veronika Sexl

16 Dept. of Biomedical Sciences, Institute of Pharmacology and Toxicology, University of  
17 Veterinary Medicine Vienna, Veterinaerplatz 1, A-1210 Vienna, Austria

18 Tel.: +43 1 25077-2910

19 e-mail: veronika.sex1@vetmeduni.ac.at

20

21 **Word count:** ~3960 words

22

23 **Key words:** hematopoietic progenitor cell, HSC, leukemic stem cell, *ex-vivo* culture, *Cdk6*

24

25

26

Generation of murine HPC<sup>LSKs</sup> for functional studies

27 **Key points:**

28 1. We describe the generation of murine cell lines (HPC<sup>LSK</sup>) which reliably mimic  
29 hematopoietic/leukemic progenitor cells.

30 2. *Cdk6*<sup>-/-</sup> BCR/ABL<sup>p210</sup> HPC<sup>LSKs</sup> uncover a novel role for CDK6 in homing.

31

32 **Abstract**

33 Studies of molecular mechanisms of hematopoiesis and leukemogenesis are hampered by the  
34 unavailability of progenitor cell lines that accurately mimic the situation *in vivo*. We now  
35 report a robust method to generate and maintain LSK (lin<sup>-</sup>, Sca-1<sup>+</sup>, c-Kit<sup>+</sup>) cells which closely  
36 resemble MPP1 cells. HPC<sup>LSK</sup> reconstitute hematopoiesis in lethally irradiated recipient mice  
37 over more than eight months. Upon transformation with different oncogenes including  
38 BCR/ABL, FLT3-ITD or MLL-AF9 their leukemic counterparts maintain stem cell properties  
39 *in vitro* and recapitulate leukemia formation *in vivo*. The method to generate HPC<sup>LSK</sup> can be  
40 applied to transgenic mice and we illustrate it for CDK6-deficient animals. Upon  
41 BCR/ABL<sup>p210</sup> transformation, *Cdk6*<sup>-/-</sup> HPC<sup>LSKs</sup> induce disease with a significantly enhanced  
42 latency and reduced incidence, showing the importance of CDK6 in leukemia formation.  
43 Studies of the CDK6 transcriptome in murine HPC<sup>LSK</sup> and human BCR/ABL<sup>+</sup> cells have  
44 verified that certain pathways depend on CDK6 and have uncovered a novel CDK6-  
45 dependent signature, suggesting a role for CDK6 in leukemic progenitor cell homing. Loss of  
46 CDK6 may thus lead to a defect in homing. The HPC<sup>LSK</sup> system represents a unique tool for  
47 combined *in vitro* and *in vivo* studies and enables the production of large quantities of  
48 genetically modifiable hematopoietic or leukemic stem/progenitor cells.

49

Generation of murine HPC<sup>LSKs</sup> for functional studies

## 50 INTRODUCTION

51 Adult hematopoietic stem cells (HSCs) represent 0.01-0.005% of all nucleated cells in the  
52 bone marrow (BM). They are unique in their ability to continuously self-renew, differentiate  
53 into distinct lineages of mature blood cells<sup>1</sup> and regenerate a functional hematopoietic system  
54 following transplantation into immunocompromised mice<sup>2-5</sup>. Most hematopoietic  
55 malignancies originate in stem/progenitor cells upon acquirement of genetic/epigenetic  
56 defects. These so called leukemic stem cells (LSCs) maintain key characteristics of regular  
57 HSCs, including the ability of self-renewing and multi-potency<sup>6,7</sup>.

58 Although hematopoietic cell differentiation is a dynamic and continuous process, cell surface  
59 marker expression defining distinct subsets and developmental stages is an inevitable tool in  
60 HSC characterization. A common strategy is to further define murine lineage negative, c-Kit  
61 and Sca-1 positive (LSK) cells by their CD48, CD135, CD150 and CD34 expression. This  
62 marker combination stratifies the most dormant HSCs into the increasingly cycling multi-  
63 potent progenitors (MPP) 1 and 2 and the myeloid or lymphoid prone MPP3 and 4<sup>8</sup>.  
64 Leukemia, analogous to normal hematopoiesis, is hierarchically organized; LSCs residing in  
65 the BM initiate and maintain the disease and give rise to their more differentiated malignant  
66 progeny. Therapeutically, LSCs are often resistant against many current cancer treatments and  
67 thus cause disease relapse<sup>9-13</sup>. Understanding potential Achilles' heels in LSCs to develop new  
68 curative therapeutic approaches is of fundamental interest and represents a major frontier of  
69 cancer biology.

70 Understanding hematopoietic disease development and defining therapeutic intervention sites  
71 requires the availability of multi-potential hematopoietic cell lines. HSCs can be maintained  
72 and expanded to a very limited extent *in vitro* - the vast majority of their progeny  
73 differentiates in culture. Numerous attempts have been made to increase the number of long-

#### Generation of murine HPC<sup>LSKs</sup> for functional studies

74 term (LT)-HSCs in culture including the use of high levels of cytokines and growth factors or  
75 ill-defined factors secreted by feeder cells<sup>14-28</sup>.

76 Alternatively, immortalization using genetic manipulation was employed to establish stem  
77 cell-like cell lines. One major limitation of these cell lines is the failure to reconstitute a fully  
78 functional hematopoietic system upon transplantation<sup>29-30</sup>. One of the most successful  
79 immortalized murine multipotent hematopoietic cell lines is the EML (Erythroid, Myeloid,  
80 and Lymphocytic) line derived by retroviral expression of a truncated, dominant-negative  
81 form of the human retinoic acid receptor. However, EML cells are phenotypically and  
82 functionally heterogeneous and display a block in the differentiation of myeloid cells<sup>31-38</sup>.

83 An alternative route for immortalization of murine multipotent hematopoietic cells was  
84 employing *Lhx2*<sup>39-41</sup>, a LIM-homeobox domain transcription factor binding a variety of  
85 transcriptional co-factors. *Lhx2* is expressed in embryonic hematopoietic locations such as the  
86 aorta-gonad-mesonephros (AGM) region, yolk sac and fetal liver, but is absent in BM, spleen  
87 and thymus of adult mice<sup>42-44</sup>. *Lhx2* up-regulates key transcriptional regulators for HSCs  
88 including *Hox* and *Gata* while down-regulating differentiation-associated genes<sup>39</sup>. *Lhx2* is  
89 aberrantly expressed in human chronic myelogenous leukemia suggesting a role for *Lhx2* in  
90 the growth of immature hematopoietic cells<sup>45</sup>. Enforced expression of *Lhx2* in BM-derived  
91 murine HSCs and embryonic stem cells (ES)/induced pluripotent (iPS) cells resulted in *ex*  
92 *vivo* expansion of engraftable HSC-like cells<sup>41,42,46</sup> strictly dependent on stem cell factor  
93 (SCF) and yet undefined autocrine loops providing additional secreted molecule(s)<sup>40</sup>. These  
94 cells generate functional progeny and long term repopulate stem cell-deficient hosts<sup>40,43,47-48</sup>.

95 The cyclin-dependent kinase 6 (CDK6) has been recently described as a critical regulator of  
96 HSC quiescence and is essential in BCR/ABL<sup>p210</sup> LSCs<sup>49-50</sup>. Besides its main characteristic,  
97 CDK6 and its close homolog CDK4 control cell cycle progression, CDK6 functions as a  
98 transcriptional regulator<sup>51-53</sup>. CDK6 is recognized as being a key oncogenic driver in

Generation of murine HPC<sup>LSKs</sup> for functional studies

99 hematopoietic malignancies and therefore represents a promising target for cancer therapy and  
100 intervention<sup>49,54-56</sup>. More recent evidence highlights the importance of CDK6 during stress,  
101 including oncogenic transformation when CDK6 counteracts p53 effects<sup>57</sup>. Furthermore,  
102 CDK6 plays a crucial role in several myeloid diseases, including Jak2<sup>V617F+</sup> MPN, CML and  
103 AML by regulating stem cell quiescence, apoptosis, differentiation and cytokine  
104 secretion<sup>49,56,58-59</sup>.

105 Using the long term culture system, it was possible to generate HPC<sup>LSKs</sup> from the transgenic  
106 mouse line *Cdk6*<sup>-/-</sup> which represents a powerful tool to analyze specific functions of CDK6 in  
107 progenitor cells and allows mechanistic and therapeutic studies tailored specifically to  
108 leukemic stem/progenitors cells.

109

Generation of murine HPC<sup>LSKs</sup> for functional studies

## 110 MATERIALS AND METHODS

### 111 Animals

112 Mice (C57BL/6N, NSG [NOD.Cg-Prkdcscid Il2rgtm 1Wjl/SzJ], Ly5.1<sup>+</sup> [B6.SJL-Ptprca]) and  
113 *Cdk6*<sup>-/-60</sup> were bred and maintained under special pathogen-free (SPF) conditions at the  
114 Institute of Pharmacology and Toxicology, University of Veterinary Medicine, Vienna,  
115 Austria. Age-matched (7-11 weeks) male and female mice were used unless indicated  
116 otherwise. All procedures were approved by the institutional ethics and animal welfare  
117 committee (BMFWF-68.205/0093-WF/V/3b/2015 and BMFWF-68.205/0112-  
118 WF/V/3b/2016) and the national authority according to §§26ff. of the Animal Experiment  
119 Act, Tierversuchsgesetz 2012 - TVG 2012.

120

### 121 HPC<sup>LSK</sup> cell line generation

122 BM of two to five C57BL/6 mice was isolated, pooled and sorted for LSK cells. Sorted LSK  
123 cells were cultured in 48-well-plates for 48 hours in a 1:1 ratio of Stem Pro-34 SFM (Gibco/  
124 Thermo Scientific, Waltham, MA, USA) and Iscoves modified Dulbecco medium (IMDM,  
125 Sigma-Aldrich, St. Louis, MO, USA) supplemented with  $0.75 \times 10^{-4}$  M 1-Thioglycerol  
126 (MTG, Sigma), Penicillin/Streptomycin (P/S, Sigma), 2 mM L-Glutamine (L-Glut, Sigma),  
127 25 U heparin (Sigma), 10 ng fibroblast growth factor (mFGF) acidic (R&D Sytems,  
128 Minneapolis, USA), 10 ng mIGF-II (R&D), 20 ng mTPO (R&D), 10 ng mIL-3 (R&D), 20 ng  
129 hIL-6 (R&D) and stem cell factor (SCF, generated in-house) used at 2% final concentration.  
130 LSK cells were transduced with a *Lhx2* pMSCV-puromycin (Clontech/Takara, Mountain  
131 View, CA, USA) vector<sup>47</sup> in 1% pegGOLD Universal Agarose (Peglab/VWR Darmstadt,  
132 Germany) coated 48-well-plates and transfected four times on day three to six with the *Lhx2*-  
133 containing viral supernatant. At day seven, cells were transferred to 1% agarose-coated 24-  
134 well-plates in IMDM with 5% FCS,  $1.5 \times 10^{-4}$  M MTG, P/S, 2 mM L-Glut referred

Generation of murine HPC<sup>LSKs</sup> for functional studies

135 hereafter as IMDM culture medium. Additionally, the IMDM culture medium was  
136 supplemented with 12.5 ng/ml IL-6 (R&D) and 2% SCF. At day ten, 1.5 µg/ml puromycin  
137 (InvivoGen, San Diego, USA) was added to the medium to select for the *Lhx2* expressing  
138 LSK cells. The same reagents were subsequently used for all the experiments.

139

#### 140 **HPC<sup>LSK</sup> cell line culture**

141 HPC<sup>LSK</sup> cell lines were kept on 1% agarose coated culture plates. Solidified plates were stored  
142 in a 5% CO<sub>2</sub> humidified incubator with 1 ml IMDM culture media per well. HPC<sup>LSK</sup> cells  
143 were plated in IMDM culture media supplemented with 12.5 ng/ml IL-6, 2% SCF and 1.5  
144 µg/ml puromycin on the agarose plates. Cells were continuously kept at a density between  
145 0.8-2 × 10<sup>6</sup> cells/ml. BM-derived HPC5 cell line was kept in IMDM culture media  
146 supplemented with 12.5 ng/ml IL-6 and 2% SCF, while BM-derived HPC9 cells and ES cell  
147 line-derived HPC-7 were cultured in IMDM supplemented with 2% SCF (all lines provided  
148 by Leif Carlsson). The virus packaging cell lines Platinum-E (Plat-E, Cell Biolabs, Inc, San  
149 Diego, CA, USA) and GP<sup>p210</sup>-GFP<sup>61</sup> were kept in DMEM (Sigma) supplemented with 10%  
150 FCS and P/S. The pre-pro-B-BCR/ABL<sup>p185</sup>-GFP were cultured in RPMI (Sigma) with 10%  
151 FCS and P/S<sup>57</sup>.

152

153

Generation of murine HPC<sup>LSKs</sup> for functional studies

## 154 **RESULTS**

### 155 **Generation of murine hematopoietic progenitor HPC<sup>LSK</sup> cell lines**

156 To meet the increasing need of studying hematopoietic stem/progenitor cells, we sought to  
157 establish a robust method to generate murine stem-cell lines by modifying a strategy that was  
158 originally described by the Carlsson lab<sup>41,47</sup>. Sorted murine LSK cells were maintained in  
159 cytokine- and growth factor-supplemented serum-free medium for 2 days. Thereafter, the  
160 cells were infected with a retroviral construct encoding *Lhx2* coupled to a puromycin selection  
161 marker and switched to SCF, IL-6 and 5% serum-containing IMDM medium on agarose-  
162 coated plates to prevent attachment-induced differentiation. Puromycin selection was initiated  
163 ten days after sorting. Within four weeks continuously proliferating, HPC<sup>LSK</sup> cell lines  
164 establish and can be stored long term by cryopreservation (Fig. 1a). LSK cells can be  
165 classified into dormant HSCs and four subsequent MPP populations based on their surface  
166 markers<sup>8</sup>. HPC<sup>LSK</sup> cell lines express c-Kit and Sca-1 but lack expression of the myeloid and  
167 lymphoid lineage markers Gr-1 (neutrophil), CD11b (monocyte/macrophage), CD3 (T cell),  
168 CD19 (B cell) and Ter119 (erythroid). According to the CD34, CD48 and CD150 expression,  
169 HPC<sup>LSKs</sup> categorize as MPP2 – a population able to give rise to myeloid and lymphoid cells<sup>8</sup>.  
170 Despite the MPP2 surface expression markers, transcriptome analysis of HPC<sup>LSKs</sup> revealed a  
171 predominant overlap with the MPP1 signature pointing to an even more immature state. Upon  
172 long-term culture a uniform cellular morphology is maintained within the cell lines (Fig 1b,  
173 Supplementary Fig. S1a-d). Comparison to other progenitor cell lines including the bone  
174 marrow derived BM-HPC5, BM-HPC9 and the ES-derived HPC-7 cell line<sup>41</sup> showed that  
175 HPC<sup>LSKs</sup> have the most immature profile. The other cell lines are either positive for lineage  
176 markers or lack Sca-1 expression. The ES-derived HPC-7 cell line stains positive for c-Kit,  
177 Sca-1, CD48 and CD150 and lacks lineage markers. It is also limited in its differentiation  
178 capacity<sup>62-63</sup> (Supplementary Fig. 1e).



Generation of murine HPC<sup>LSKs</sup> for functional studies

179

180 **HPC<sup>LSK</sup> cells are able to differentiate to myeloid and lymphoid cells *in vitro***

181 To explore signaling patterns, HPC<sup>LSK</sup> cells were treated with cytokines for 15 min. EPO,  
182 GM-CSF or IL-3 resulted in phosphorylation and activation of STAT5, STAT3, AKT and  
183 ERK signaling, while IL-6 induced predominantly STAT3 phosphorylation. STAT3, AKT  
184 and ERK were also activated upon SCF treatment albeit to a lesser extent in line with  
185 signaling in stem/progenitor cells (Fig. 1c). In line, HPC<sup>LSK</sup> cells formed erythroid (BFU-E),  
186 myeloid (CFU-GM, CFU-GEMM) and pre-B (CFU-preB) cell colonies in methylcellulose  
187 enriched cytokines (EPO, GMCSF, IL-7, SCF, IL-6, IL-3) comparable to primary BM-  
188 derived cells (Fig. 1d-e). We confirmed expression of erythroid (Ter119/CD71), myeloid  
189 (CD11b/Gr-1) or B cell (B220/CD93) markers on these colonies (Supplementary Fig 1g). In  
190 comparison, the ability to form colonies and to *in vitro* differentiate of HPC-7 and BM-HPC5  
191 cells was reduced in accordance with an impaired cytokine-induced activation of STAT5,  
192 STAT3, AKT and ERK (Supplementary Fig. S1h-j).

193

194 **HPC<sup>LSKs</sup> are multipotent *in vivo***

195 As HPC<sup>LSKs</sup> differentiate into myeloid and lymphoid lineages *in vitro*, we explored the  
196 potential of the cells to protect mice from radiation-induced death *in vivo*. Lethally irradiated  
197 Ly5.1<sup>+</sup> mice received 1x10<sup>7</sup> Ly5.2<sup>+</sup> BM-HPC5 or HPC<sup>LSK</sup> cells per tail vein injection. Ly5.2<sup>+</sup>  
198 BM cells were used as controls. Non-injected irradiated mice died within 10 days, briefly  
199 thereafter followed by BM-HPC5 recipients. Injection of HPC<sup>LSKs</sup> and injection of primary  
200 BM cells rescued the mice due to the efficient repopulation of the hematopoietic system (Fig.  
201 2a-b). After 40 days, white blood cell (WBC) and red blood cell (RBC) counts were  
202 comparable between HPC<sup>LSKs</sup>-injected and BM-injected controls (Fig. 2c). Blood counts  
203 remained stable over a 6-months-period after which the experiment was terminated

Generation of murine HPC<sup>LSKs</sup> for functional studies

204 (Supplementary Fig. S2a). HPC<sup>LSKs</sup> had efficiently homed to the BM, blood, spleen and  
205 thymus comparable to the BM control and no alterations of the spleen weight was detectable  
206 (Fig. 2d-e). FACS analysis confirmed the efficient repopulation of the hematopoietic system.  
207 Numbers of myeloid and lymphoid progenitors in the BM and differentiated blood cells (Gr-  
208 1<sup>+</sup> granulocytes, CD11b<sup>+</sup> monocytes, Gr-1/CD11b<sup>+</sup> eosinophils/neutrophils and B220<sup>+</sup> B  
209 cells) were comparable to BM-injected mice. Only HPC<sup>LSK</sup>-derived CD4<sup>+</sup> or CD8<sup>+</sup> T cells  
210 were significantly lower in the blood, however, were present in the thymus in similar numbers  
211 as in the BM-injected control (Fig. 2f).

212 To determine cell numbers required for hematopoietic repopulation in mice, we gradually  
213 lowered the cell number used for injection.  $2.5 \times 10^6$  HPC<sup>LSKs</sup> sufficed to allow for an 80%  
214 survival of the animals for a period of at least 8 months, after which the experiment was  
215 terminated. Injection of  $1 \times 10^6$  HPC<sup>LSKs</sup> did not induce long-term survival but significantly  
216 prolonged the lifespan of lethally irradiated animals (median survival: 51 days compared to  
217 8.5 days) (Supplementary Fig. S2b and S2c). These experiments led us to conclude that  
218 HPC<sup>LSKs</sup> possess the ability for long-term replenishment of the hematopoietic system.

219

## 220 **Generation of leukemic HPC<sup>LSKs</sup> as a model for leukemic stem cells (LSCs)**

221 LSCs differ from the bulk of leukemic cells and possess the ability for self-renewal. To  
222 establish LSC models, we infected HPC<sup>LSKs</sup> with a retrovirus encoding for oncogenes either  
223 inducing myeloid (BCR/ABL<sup>p210</sup>, MLL-AF9, Flt3-ITD;NRas<sup>G12D</sup>) or lymphoid  
224 (BCR/ABL<sup>p185</sup>) leukemia (Fig. 3a). Analysis of signaling pathways in the GFP<sup>+</sup> leukemic  
225 lines showed that the cells faithfully reflected the signaling patterns downstream of the  
226 respective oncogene. As described, BCR/ABL predominantly induced phosphorylation of  
227 CRKL and STAT5<sup>61,64</sup>. Flt3-ITD;NRas<sup>G12D</sup> was associated with a pronounced JAK2, STAT5,  
228 AKT and ERK signaling activation<sup>65</sup> and MLL-AF9 upregulated c-MYC<sup>66</sup> (Fig. 3b). In the

Generation of murine HPC<sup>LSKs</sup> for functional studies

229 presence of SCF and IL-6, transformed HPC<sup>LSKs</sup> retained the expression of stem cell markers.  
230 A small fraction of the cells differentiated and upregulated the respective lineage markers.  
231 BCR/ABL positive LSCs were able to grow cytokine independently, whereas other oncogenes  
232 are shown with SCF (Fig. 3c-d). Except for MLL-AF9, all oncogenes tested formed growth  
233 factor-independent colonies in methylcellulose gel (Supplementary Fig. S3a).  
234 To determine their leukemic potential *in vivo*, transformed HPC<sup>LSKs</sup> were injected  
235 intravenously (*i.v.*) into NSG mice (Fig. 4a, left). HPC<sup>LSKs</sup> BCR/ABL<sup>p185</sup> inflicted disease  
236 within 12 days, followed by HPC<sup>LSKs</sup> BCR/ABL<sup>p210</sup> and HPC<sup>LSKs</sup> Flt3-ITD;NRas<sup>G12D</sup> which  
237 succumbed to disease within 50 days. The longest disease latency was observed upon  
238 injection of HPC<sup>LSKs</sup> MLL-AF9 which induced disease after three months (Fig. 4a, right). All  
239 diseased animals displayed elevated WBC counts, blast-like cells in the blood and suffered  
240 from splenomegaly (Fig. 4b, 4d, Supplementary Fig. S4a). GFP<sup>+</sup> transformed HPC<sup>LSK</sup> cells  
241 were detected in the blood, spleen and BM of the diseased mice (Fig. 4c). HPC<sup>LSKs</sup>  
242 BCR/ABL<sup>p210</sup>, HPC<sup>LSKs</sup> MLL-AF9 and HPC<sup>LSKs</sup> FLT3/NRas<sup>G12D</sup>-injected animals suffered  
243 from myeloid leukemia with an average of 92% CD11b<sup>+</sup> cells, whereas HPC<sup>LSKs</sup>  
244 BCR/ABL<sup>p185</sup>-injected NSGs developed predominantly GFP<sup>+</sup> B cells with a percentage mean  
245 of 32% of CD19<sup>+</sup> cells (Fig. 4e, Supplementary Fig. S4b-d). These experiments determine  
246 HPC<sup>LSK</sup> cells as a valid model system studying leukemogenesis *in vivo* downstream of several  
247 oncogenic drivers.

248

249 **HPC<sup>LSKs</sup> from a transgenic mouse strain – *Cdk6*<sup>-/-</sup> HPC<sup>LSKs</sup>**

250 CDK6 plays a key role as a transcriptional regulator for HSC activation and its function  
251 extends to LSCs<sup>49</sup>. To gain insights into distinct functions of CDK6 in HSCs/LSCs, we  
252 generated HPC<sup>LSK</sup> cell lines from *Cdk6*<sup>-/-</sup> transgenic mice<sup>60</sup>. CDK4 does not compensate for  
253 the loss of CDK6 in those lines (Supplementary Fig. 5a). *Cdk6*<sup>-/-</sup> HPC<sup>LSKs</sup> grow under normal

Generation of murine HPC<sup>LSKs</sup> for functional studies

254 HPC<sup>LSK</sup> culture conditions albeit with a reduced cell proliferation and slightly increased  
255 apoptosis when compared to wild type HPC<sup>LSKs</sup> (Fig. 5a, Supplementary Fig. 5b).  $5 \times 10^6$   
256 *Cdk6*<sup>+/+</sup> or *Cdk6*<sup>-/-</sup> HPC<sup>LSKs</sup> were equally well capable to rescue lethally irradiated mice for up  
257 to 60 days (data not shown).

258 In a murine CML model BCR/ABL<sup>p210</sup> *Cdk6*<sup>-/-</sup> BM cells induced disease significantly slower  
259 and with a drastically reduced disease phenotype<sup>49</sup>. To investigate whether this phenotype can  
260 be recapitulated with HPC<sup>LSKs</sup>, we generated *Cdk6*<sup>+/+</sup> and *Cdk6*<sup>-/-</sup> BCR/ABL<sup>p210</sup> HPC<sup>LSKs</sup> by  
261 retroviral infection. Irrespective of the presence of CDK6, BCR/ABL<sup>p210</sup> HPC<sup>LSKs</sup> grow in the  
262 absence of any cytokine and retain the expression of LSK markers (Supplementary Fig. 5c).  
263 In line with murine CML models, *Cdk6*<sup>-/-</sup> BCR/ABL<sup>p210</sup> HPC<sup>LSKs</sup> form fewer growth-factor  
264 independent colonies when compared to *Cdk6*<sup>+/+</sup> controls 7 days after plating, yet the  
265 difference did not reach significance (Fig. 5b)<sup>49</sup>. BCR/ABL<sup>p210</sup> HPC<sup>LSK</sup>-derived colonies  
266 displayed Gr-1 and CD11b marker expression. However, *Cdk6*<sup>-/-</sup> BCR-ABL<sup>p210</sup> HPC<sup>LSKs</sup> show  
267 a trend to higher Gr-1 and lower CD11b expression compared to wild type (Supplementary  
268 Fig. S5d). To study the leukemic potential of *Cdk6*<sup>-/-</sup> BCR/ABL<sup>p210</sup> HPC<sup>LSKs</sup> *in vivo*, we  
269 injected  $1 \times 10^6$  cells *i.v.* into NSG mice. *Cdk6*<sup>+/+</sup> BCR/ABL<sup>p210</sup> HPC<sup>LSKs</sup> inflict disease within  
270 14 days with severe signs of leukemia, including splenomegaly (Fig. 5c, Supplementary Fig.  
271 S5e). In contrast, *Cdk6*<sup>-/-</sup> BCR/ABL<sup>p210</sup> HPC<sup>LSKs</sup> failed to induce disease within this time  
272 period and only two thirds of the mice started to show signs of disease around 80 days after  
273 injection whereas one third of the animals did not develop any sign of leukemia within 7  
274 months. Analysis of diseased mice show a reduced infiltration of *Cdk6*<sup>-/-</sup> BCR/ABL<sup>p210</sup>  
275 HPC<sup>LSKs</sup> into the BM and spleen, the percentage of BCR/ABL<sup>p210</sup> GFP<sup>+</sup> cells is comparable to  
276 *Cdk6*<sup>+/+</sup> control cells (Fig. 5d, Supplementary Fig. S5f). These results underline the crucial  
277 role of CDK6 in BCR/ABL<sup>p210</sup> LSCs and verify the potential of our novel cellular HPC<sup>LSK</sup>  
278 system to charter leukemic phenotypes.

Generation of murine HPC<sup>LSKs</sup> for functional studies

279

## 280 **CDK6 dependent transcript alterations**

281 To study CDK6-dependent gene regulation in untransformed and BCR/ABL<sup>p210</sup> transformed  
282 HPC<sup>LSKs</sup>, we performed RNA-Seq analysis. Untransformed HPC<sup>LSKs</sup> lacking CDK6 show an  
283 altered gene regulation with 1335 genes up- and 661 genes down-regulated when compared to  
284 *Cdk6*<sup>+/+</sup> HPC<sup>LSKs</sup> (Fig. 6a). These differences decreased upon transformation; cytokine-  
285 independent BCR/ABL<sup>p210</sup> HPC<sup>LSKs</sup> showed 85 up- and 468 genes down-regulated in the  
286 absence of CDK6 compared to controls. Overall, 80% and 40% of genes found to be up- or  
287 downregulated in *Cdk6*<sup>-/-</sup> BCR/ABL<sup>p210</sup> HPC<sup>LSK</sup> cells were also de-regulated in *Cdk6*<sup>-/-</sup>  
288 untransformed HPC<sup>LSK</sup> cells defining a transformation-independent gene signature  
289 downstream of CDK6 (Fig. 6B). Gene Ontology enrichment analyses of CDK6 dependent  
290 genes revealed an association with immune response, cell adhesion, cell death and myeloid  
291 cell differentiation irrespective of the transformation status (Fig. 6C). The differential gene  
292 expression in our murine BCR/ABL<sup>p210</sup> HPC<sup>LSK</sup> cells was compared to CDK6 associated gene  
293 expression changes in human CML samples. To do so, we stratified a dataset from 76 human  
294 CML patients into CDK6<sup>high</sup> and CDK6<sup>low</sup> samples based on quartile expression of CDK6 and  
295 subsequently calculated the differential gene expression. We identified 101 genes that are  
296 regulated in a CDK6 –dependent manner in murine and human BCR/ABL<sup>p210</sup> cells (Fig. 6D).  
297 In human and mouse CDK6 dependent deregulated genes belong to pathways pointing at  
298 apoptosis/stress response, cell differentiation and homing.

299

## 300 **Validation of CDK6 dependent pathways in LSCs**

301 In line with the deregulated pathways in human and mouse resulting from the RNA-Seq  
302 analysis, we recently demonstrated that CDK6 regulates apoptosis during BCR/ABL<sup>p185</sup>

Generation of murine HPC<sup>LSKs</sup> for functional studies

303 transformation<sup>57</sup>. To validate this aspect in our HPC<sup>LSK</sup> system, we serum starved *Cdk6*<sup>+/+</sup> and  
304 *Cdk6*<sup>-/-</sup> BCR/ABL<sup>p210</sup> HPC<sup>LSKs</sup> for 90 minutes and performed an apoptosis staining by flow  
305 cytometry (Fig. 7a). As expected, *Cdk6*<sup>-/-</sup> BCR/ABL<sup>p210</sup> HPC<sup>LSKs</sup> showed increased response  
306 to stress.

307 In addition to apoptosis, cell differentiation was one of the most significant deregulated  
308 pathways detected by the transcriptome analysis. Colonies from *Cdk6*<sup>-/-</sup> BCR/ABL<sup>p210</sup>  
309 HPC<sup>LSKs</sup> showed a bias to the granulocytic direction by increased Gr-1 expression  
310 (Supplementary Fig. S5c). In the RNA-Seq analysis and validated by qPCR, *Csf3r*, an  
311 essential receptor for granulocytic differentiation, is upregulated in *Cdk6*<sup>-/-</sup> BCR/ABL<sup>p210</sup> cells  
312 compared to controls (Fig. 7b). Further, cytokine independent *Cdk6*<sup>-/-</sup> BCR/ABL<sup>p210</sup> HPC<sup>LSKs</sup>  
313 show increased mean fluorescence intensity (MFI) levels of Gr1 and reduced MFI levels of  
314 CD11b compared to *Cdk6*<sup>+/+</sup> controls (Fig. 7C). Together, these data demonstrate that loss of  
315 CDK6 shows an advantage for granulocytic differentiation.

316 Last but not least, the reduced percentages of *Cdk6*<sup>-/-</sup> BCR/ABL<sup>p210</sup> HPC<sup>LSKs</sup> in the BM and  
317 spleen upon *i.v.* injection (Fig. 5d) together with the RNA-Seq analysis point towards a  
318 hampered homing capacity of *Cdk6*<sup>-/-</sup> BCR/ABL<sup>p210</sup> HPC<sup>LSK</sup> cells. We validated several  
319 deregulated genes found in the transcriptome analysis which can be linked to homing by  
320 qPCR analysis (Fig. 7D) and performed an *in vivo* homing assay. To do so, we injected 1\*10<sup>6</sup>  
321 BCR/ABL<sup>p210</sup> HPC<sup>LSKs</sup> with and without CDK6 into aged and gender matched female  
322 C57BL/6N mice and profiled the number of BCR/ABL<sup>p210</sup> GFP<sup>+</sup> cells after 18h in the BM and  
323 spleen by flow cytometry. *Cdk6*<sup>-/-</sup> BCR/ABL<sup>p210</sup> HPC<sup>LSKs</sup> showed a significantly diminished  
324 homing capability to the BM compared to *Cdk6*<sup>+/+</sup> BCR/ABL<sup>p210</sup> HPC<sup>LSKs</sup>.

Generation of murine HPC<sup>LSKs</sup> for functional studies

325 Taken together, the validated data describes essential roles of CDK6 in LSCs and supports the  
326 strong reliability of our murine cellular system. Moreover, we here describe a prominent  
327 function for CDK6 in regulating BCR/ABL<sup>p210</sup> leukemic cell homing.

328

329

330

Generation of murine HPC<sup>LSKs</sup> for functional studies

## 331 **DISCUSSION**

332 Functional and molecular studies on hematopoietic and leukemic stem cells have provided  
333 numerous insights into the mechanisms of hematopoietic diseases. However, progress is  
334 restricted by the limited availability of hematopoietic stem/progenitor cells and the difficulty  
335 of *in vitro* culturing. We present a robust procedure to generate an unlimited source of  
336 functional mouse HSC/HPC lines called HPC<sup>LSK</sup> that possess characteristics of MPPs and can  
337 serve as a source of lymphoid and myeloid LSC lines. HPC<sup>LSKs</sup> are multipotent cells that  
338 retain lymphoid and myeloid differentiation potential and can repopulate lethally irradiated  
339 mice without supporter BM cells. More than 90% of HPC<sup>LSKs</sup> are Lin<sup>-</sup>/c-Kit<sup>+</sup>/Sca-1<sup>+</sup> and  
340 express CD34, CD48 and CD150, which is characteristic of MPP2. They also express CD41,  
341 which marks cells at the embryonic AGM that constitute the myelo-erythroid and  
342 myelo-lymphoid branchpoint in early hematopoiesis<sup>67-68</sup>. The transcriptome of the cells most  
343 closely resembles that of MPP1 cells, which correspond to the earliest proliferating  
344 stem/progenitor cell.

345 Our approach is robust and simple and requires no co-culture system or feeder layer and no  
346 extensive amounts of cytokines. We have established more than 50 distinct HPC<sup>LSK</sup> cell lines  
347 with an efficiency of 100%, using either mouse strains of various genetic backgrounds or  
348 transgenic mice as a source. HPC<sup>LSK</sup> cells can be genetically modified by retroviral  
349 transduction or CrispR/Cas9 technologies, so are a versatile tool in HSC and LSC research.

350 Our method is based on the enforced expression of *Lhx2*, a transcription factor for mouse  
351 HPC immortalization<sup>39,41-42,46-47</sup>. Improvements to the original protocol include FACS sorting  
352 of LSKs to avoid 5-FU treatment, the use of serum low-media with a defined cocktail of  
353 cytokines, pre-coating of plates to avoid adherence-induced myeloid differentiation and the  
354 maintenance of high HPC<sup>LSK</sup> cell density<sup>4,41,47,69-75</sup>. *Lhx2*-immortalized HPCs have been  
355 reported to induce a transplantable myeloproliferative disorder resembling human chronic



Generation of murine HPC<sup>LSKs</sup> for functional studies

356 myeloid leukemia in long-term engrafted mice<sup>76</sup>. We did not observe this even after long-term  
357 repopulation in lethally irradiated Ly5.1 or in immunosuppressed NSG mice. The difference  
358 probably stems from our use of sorted LSKs instead of total BM to overexpress *Lhx2*, as the  
359 myeloid disorder may originate from a more differentiated myeloid progenitor. We have used  
360 HPC<sup>LSKs</sup> as a source to generate leukemic stem cells and obtained leukemic HPC<sup>LSK</sup> lines  
361 harboring BCR/ABL, MLL-AF9 and Flt3-ITD;NRas<sup>G12D</sup> oncogenes. Removal of SCF and IL-  
362 6 *in vitro* induced myeloid differentiation, indicating that the self-renewal program depends  
363 on the presence of low-level cytokines and downstream signaling events that are provided *in*  
364 *vivo* by the BM niche.

365 The cell cycle kinase CDK6 is a transcriptional regulator and is particularly important in  
366 hematopoietic malignancies. In HSCs, its actions are largely independent of its kinase  
367 activity. It is essential for HSC activation in the most dormant stem cell population under  
368 stress situations, including transplantation and oncogenic stress. The impact of CDK6 extends  
369 to leukemic stem cells, as BCR/ABL<sup>p210</sup>-transformed BM cells fail to induce disease *in vivo* in  
370 the absence of CDK6. To investigate how CDK6 drives leukemogenesis in progenitor cells,  
371 we generated *Cdk6*<sup>-/-</sup> HPC<sup>LSKs</sup> from *Cdk6*-deficient mice and transformed them with  
372 BCR/ABL<sup>p210</sup>. The absence of CDK6 was associated with a reduced incidence of leukemia  
373 and with significantly delayed disease development, thereby mimicking the effects seen in  
374 primary bone marrow transplantation assays. RNA-Seq and subsequent pathway analysis  
375 show deregulated stress response, cell adhesion and apoptotic processes/cell death in the  
376 absence of CDK6. This result is consistent with our recent observations that CDK6  
377 antagonizes p53 responses and regulates survival. In the absence of CDK6, hematopoietic  
378 cells need to overcome oncogenic-induced stress by mutating p53 or activating alternative  
379 survival pathways, as in the case of *Cdk6*-deficient JAK2<sup>V617F</sup> positive LSKs. Another

Generation of murine HPC<sup>LSKs</sup> for functional studies

380 featured shared by CDK6-deficient JAK2<sup>V617F+</sup> LSKs and CDK6-deficient BCR/ABL HPC<sup>LSK</sup>  
381 is an altered cytokine secretion, as revealed by pathway enrichment analysis in both systems.  
382 HSCs show homing and cell adhesion, which allow them to migrate to the bone marrow and  
383 replenish hematopoietic lineages<sup>77</sup>. GO pathway analysis revealed deregulated cell adhesion  
384 and cell migration pathways in HPC<sup>LSK</sup> cell lines and in human patient samples. Our  
385 bioinformatic data show that loss of CDK6 from transformed cells leads to a significantly  
386 reduced capacity to home to the bone marrow, which slows the onset of leukemic disease. The  
387 common CDK6 dependent gene signature between BCR/ABL<sup>p210</sup> HPC<sup>LSKs</sup> and human CML  
388 patient samples underlines the translational relevance of our model system. A large subset of  
389 CDK6 regulated genes is also found in patients, which we could validate with specific assays  
390 using our BCR/ABL<sup>p210</sup> HPC<sup>LSKs</sup>. The data strengthen our confidence in our murine cellular  
391 system and show that results from HPC<sup>LSK</sup> experiments can be translated to the human  
392 situation. HPC<sup>LSK</sup> lines thus represent a quick and simple alternative to the lymphoid  
393 progenitor Ba/F3 or the myeloblast-like 32D cells to explore the potential transforming ability  
394 of mutations found in hematopoietic malignancies.

395

396 **Author contributions:** ED and IMM designed and conducted experiments, collected and  
397 analyzed data. TB, BM and IM collected and analyzed data. RG, MZ and GH performed bio-  
398 informatical analysis. LC was involved in conception and design of the study, contributed  
399 essential material and reviewed the manuscript. KK designed and supervised experiments.  
400 AHK reviewed the manuscript and supervised experiments. VS designed and supervised the  
401 study, VS, ED, IMM, BM and KK wrote the manuscript.

402

403

Generation of murine HPC<sup>LSKs</sup> for functional studies

404 **Acknowledgements:**

405 We thank P. Kudweis, S. Fajmann, M. Ensfelder-Koparek and P. Jodl for excellent technical  
406 support and M. Dolezal for critical discussion of bioinformatical analysis. We thank the  
407 Biomedical Sequencing Facility (BSF) at CeMM for NGS library preparation, sequencing and  
408 related bioinformatics analyses.

409

410 **Funding:**

411 This work was supported by the European Research Council (ERC) under the European  
412 Union's Horizon 2020 research and innovation programme grant agreement No 694354. This  
413 work was supported by the Austrian Science Foundation (FWF) via grants to K.K. (P 31773).

414 **Conflict of interest:** The authors declare that they have no conflicts of interest.

415

Generation of murine HPC<sup>LSKs</sup> for functional studies

416 **REFERENCES**

417

- 418 1. Metcalf D. On hematopoietic stem cell fate. *Immunity*. 2007;26(6):669-673.
- 419 2. Osawa M, Hanada K, Hamada H, Nakauchi H. Long-term lymphohematopoietic reconstitution  
420 by a single CD34-low/negative hematopoietic stem cell. *Science*. 1996;273(5272):242-245.
- 421 3. Spangrude GJ, Heimfeld S, Weissman IL. Purification and characterization of mouse  
422 hematopoietic stem cells. *Science*. 1988;241(4861):58-62.
- 423 4. Seita J, Weissman IL. Hematopoietic stem cell: self-renewal versus differentiation. *Wiley*  
424 *interdisciplinary reviews Systems biology and medicine*. 2010;2(6):640-653.
- 425 5. Gottgens B. Regulatory network control of blood stem cells. *Blood*. 2015;125(17):2614-2620.
- 426 6. Huntly BJ, Gilliland DG. Cancer biology: summing up cancer stem cells. *Nature*.  
427 2005;435(7046):1169-1170.
- 428 7. Woll PS, Kjallquist U, Chowdhury O, et al. Myelodysplastic syndromes are propagated by rare  
429 and distinct human cancer stem cells in vivo. *Cancer cell*. 2014;25(6):794-808.
- 430 8. Cabezas-Wallscheid N, Klimmeck D, Hansson J, et al. Identification of Regulatory Networks in  
431 HSCs and Their Immediate Progeny via Integrated Proteome, Transcriptome, and DNA Methylome  
432 Analysis. *Cell Stem Cell*. 2014;15(4):507-522.
- 433 9. Thomas D, Majeti R. Biology and relevance of human acute myeloid leukemia stem cells.  
434 *Blood*. 2017;129(12):1577-1585.
- 435 10. Holyoake TL, Vetrie D. The chronic myeloid leukemia stem cell: stemming the tide of  
436 persistence. *Blood*. 2017;129(12):1595-1606.
- 437 11. Pollyea DA, Jordan CT. Therapeutic targeting of acute myeloid leukemia stem cells. *Blood*.  
438 2017;129(12):1627-1635.
- 439 12. Riether C, Schurch CM, Ochsenbein AF. Regulation of hematopoietic and leukemic stem cells  
440 by the immune system. *Cell death and differentiation*. 2015;22(2):187-198.
- 441 13. Houshmand M, Simonetti G, Circosta P, et al. Chronic myeloid leukemia stem cells. *Leukemia*.  
442 2019;33(7):1543-1556.
- 443 14. Yonemura Y, Ku H, Lyman SD, Ogawa M. In vitro expansion of hematopoietic progenitors and  
444 maintenance of stem cells: comparison between FLT3/FLK-2 ligand and KIT ligand. *Blood*.  
445 1997;89(6):1915-1921.
- 446 15. Ogawa M, Yonemura Y, Ku H. In vitro expansion of hematopoietic stem cells. *Stem cells*.  
447 1997;15 Suppl 1:7-11; discussion 12.
- 448 16. Miller CL, Eaves CJ. Expansion in vitro of adult murine hematopoietic stem cells with  
449 transplantable lympho-myeloid reconstituting ability. *Proceedings of the National Academy of*  
450 *Sciences of the United States of America*. 1997;94(25):13648-13653.
- 451 17. Yagi M, Ritchie KA, Sitnicka E, Storey C, Roth GJ, Bartelmez S. Sustained ex vivo expansion of  
452 hematopoietic stem cells mediated by thrombopoietin. *Proceedings of the National Academy of*  
453 *Sciences of the United States of America*. 1999;96(14):8126-8131.
- 454 18. Huynh H, Iizuka S, Kaba M, et al. Insulin-like growth factor-binding protein 2 secreted by a  
455 tumorigenic cell line supports ex vivo expansion of mouse hematopoietic stem cells. *Stem cells*.  
456 2008;26(6):1628-1635.
- 457 19. Dexter TM, Garland J, Scott D, Scolnick E, Metcalf D. Growth of factor-dependent  
458 hemopoietic precursor cell lines. *The Journal of experimental medicine*. 1980;152(4):1036-1047.
- 459 20. Greenberger JS, Sakakeeny MA, Humphries RK, Eaves CJ, Eckner RJ. Demonstration of  
460 permanent factor-dependent multipotential (erythroid/neutrophil/basophil) hematopoietic  
461 progenitor cell lines. *Proceedings of the National Academy of Sciences of the United States of*  
462 *America*. 1983;80(10):2931-2935.
- 463 21. Varnum-Finney B, Brashem-Stein C, Bernstein ID. Combined effects of Notch signaling and  
464 cytokines induce a multiple log increase in precursors with lymphoid and myeloid reconstituting  
465 ability. *Blood*. 2003;101(5):1784-1789.

Generation of murine HPC<sup>LSKs</sup> for functional studies

- 466 22. Dallas MH, Varnum-Finney B, Martin PJ, Bernstein ID. Enhanced T-cell reconstitution by  
467 hematopoietic progenitors expanded ex vivo using the Notch ligand Delta1. *Blood*. 2007;109(8):3579-  
468 3587.
- 469 23. Crane GM, Jeffery E, Morrison SJ. Adult haematopoietic stem cell niches. *Nature reviews*  
470 *Immunology*. 2017;17(9):573-590.
- 471 24. Vaidya A, Kale V. Hematopoietic Stem Cells, Their Niche, and the Concept of Co-Culture  
472 Systems: A Critical Review. *Journal of stem cells*. 2015;10(1):13-31.
- 473 25. Krosl J, Austin P, Beslu N, Kroon E, Humphries RK, Sauvageau G. In vitro expansion of  
474 hematopoietic stem cells by recombinant TAT-HOXB4 protein. *Nature medicine*. 2003;9(11):1428-  
475 1432.
- 476 26. Willert K, Brown JD, Danenberg E, et al. Wnt proteins are lipid-modified and can act as stem  
477 cell growth factors. *Nature*. 2003;423(6938):448-452.
- 478 27. Moore KA, Ema H, Lemischka IR. In vitro maintenance of highly purified, transplantable  
479 hematopoietic stem cells. *Blood*. 1997;89(12):4337-4347.
- 480 28. Fraser CC, Eaves CJ, Szilvassy SJ, Humphries RK. Expansion in vitro of retrovirally marked  
481 totipotent hematopoietic stem cells. *Blood*. 1990;76(6):1071-1076.
- 482 29. Beug H, Dahl R, Steinlein P, Meyer S, Deiner EM, Hayman MJ. In vitro growth of factor-  
483 dependent multipotential hematopoietic cells is induced by the nuclear oncoprotein v-Ski. *Oncogene*.  
484 1995;11(1):59-72.
- 485 30. Itoh K, Friel J, Kluge N, et al. A novel hematopoietic multilineage clone, Myl-D-7, is stromal  
486 cell-dependent and supported by an alternative mechanism(s) independent of stem cell factor/c-kit  
487 interaction. *Blood*. 1996;87(8):3218-3228.
- 488 31. Tsai S, Bartelmez S, Sitnicka E, Collins S. Lymphohematopoietic progenitors immortalized by a  
489 retroviral vector harboring a dominant-negative retinoic acid receptor can recapitulate lymphoid,  
490 myeloid, and erythroid development. *Genes & development*. 1994;8(23):2831-2841.
- 491 32. Ye ZJ, Kluger Y, Lian Z, Weissman SM. Two types of precursor cells in a multipotential  
492 hematopoietic cell line. *Proceedings of the National Academy of Sciences of the United States of*  
493 *America*. 2005;102(51):18461-18466.
- 494 33. Chang HH, Hemberg M, Barahona M, Ingber DE, Huang S. Transcriptome-wide noise controls  
495 lineage choice in mammalian progenitor cells. *Nature*. 2008;453(7194):544-547.
- 496 34. Ye ZJ, Gulcicek E, Stone K, Lam T, Schulz V, Weissman SM. Complex interactions in EML cell  
497 stimulation by stem cell factor and IL-3. *Proceedings of the National Academy of Sciences of the*  
498 *United States of America*. 2011;108(12):4882-4887.
- 499 35. Pina C, Fugazza C, Tipping AJ, et al. Inferring rules of lineage commitment in haematopoiesis.  
500 *Nature cell biology*. 2012;14(3):287-294.
- 501 36. Kutlesa S, Zayas J, Valle A, Levy RB, Jurecic R. T-cell differentiation of multipotent  
502 hematopoietic cell line EML in the OP9-DL1 coculture system. *Experimental hematology*.  
503 2009;37(8):909-923.
- 504 37. Lee HM, Zhang H, Schulz V, Tuck DP, Forget BG. Downstream targets of HOXB4 in a cell line  
505 model of primitive hematopoietic progenitor cells. *Blood*. 2010;116(5):720-730.
- 506 38. Wu JQ, Seay M, Schulz VP, et al. Tcf7 is an important regulator of the switch of self-renewal  
507 and differentiation in a multipotential hematopoietic cell line. *PLoS genetics*. 2012;8(3):e1002565.
- 508 39. Kitajima K, Kawaguchi M, Iacovino M, Kyba M, Hara T. Molecular functions of the LIM-  
509 homeobox transcription factor Lhx2 in hematopoietic progenitor cells derived from mouse  
510 embryonic stem cells. *Stem cells*. 2013;31(12):2680-2689.
- 511 40. Pinto do OP, Wandzioch E, Kolterud A, Carlsson L. Multipotent hematopoietic progenitor cells  
512 immortalized by Lhx2 self-renew by a cell nonautonomous mechanism. *Experimental hematology*.  
513 2001;29(8):1019-1028.
- 514 41. Pinto do OP, Richter K, Carlsson L. Hematopoietic progenitor/stem cells immortalized by Lhx2  
515 generate functional hematopoietic cells in vivo. *Blood*. 2002;99(11):3939-3946.

Generation of murine HPC<sup>LSKs</sup> for functional studies

- 516 42. Kitajima K, Minehata K, Sakimura K, Nakano T, Hara T. In vitro generation of HSC-like cells  
517 from murine ESCs/iPSCs by enforced expression of LIM-homeobox transcription factor Lhx2. *Blood*.  
518 2011;117(14):3748-3758.
- 519 43. Xu Y, Baldassare M, Fisher P, et al. LH-2: a LIM/homeodomain gene expressed in developing  
520 lymphocytes and neural cells. *Proceedings of the National Academy of Sciences of the United States*  
521 *of America*. 1993;90(1):227-231.
- 522 44. Kolterud Å, Wandzioch E, Carlsson L. Lhx2 is expressed in the septum transversum  
523 mesenchyme that becomes an integral part of the liver and the formation of these cells is  
524 independent of functional Lhx2. *Gene Expression Patterns*. 2004;4(5):521-528.
- 525 45. Al-Jehani F, Hochhaus A, Spencer A, Goldman JM, Melo JV. Expression of the LH2 gene in  
526 chronic myeloid leukaemia cells. *Leukemia*. 1996;10(7):1122-1126.
- 527 46. Kitajima K, Kawaguchi M, Miyashita K, Nakajima M, Kanokoda M, Hara T. Efficient production  
528 of T cells from mouse pluripotent stem cells by controlled expression of Lhx2. *Genes to cells : devoted*  
529 *to molecular & cellular mechanisms*. 2015;20(9):720-738.
- 530 47. Pinto do OP, Kolterud A, Carlsson L. Expression of the LIM-homeobox gene LH2 generates  
531 immortalized steel factor-dependent multipotent hematopoietic precursors. *The EMBO journal*.  
532 1998;17(19):5744-5756.
- 533 48. Porter FD, Drago J, Xu Y, et al. Lhx2, a LIM homeobox gene, is required for eye, forebrain, and  
534 definitive erythrocyte development. *Development*. 1997;124(15):2935-2944.
- 535 49. Scheicher R, Hoelbl-Kovacic A, Bellutti F, et al. CDK6 as a key regulator of hematopoietic and  
536 leukemic stem cell activation. *Blood*. 2015;125(1):90-101.
- 537 50. Laurenti E, Frelin C, Xie S, et al. CDK6 levels regulate quiescence exit in human hematopoietic  
538 stem cells. *Cell stem cell*. 2015;16(3):302-313.
- 539 51. Tigan AS, Bellutti F, Kollmann K, Tebb G, Sexl V. CDK6-a review of the past and a glimpse into  
540 the future: from cell-cycle control to transcriptional regulation. *Oncogene*. 2016;35(24):3083-3091.
- 541 52. Sherr CJ, Beach D, Shapiro GI. Targeting CDK4 and CDK6: From Discovery to Therapy. *Cancer*  
542 *discovery*. 2016;6(4):353-367.
- 543 53. Nebenfuehr S, Kollmann K, Sexl V. The role of CDK6 in cancer. *International journal of cancer*.  
544 2020.
- 545 54. Kollmann K, Heller G, Schneckenleithner C, et al. A kinase-independent function of CDK6 links  
546 the cell cycle to tumor angiogenesis. *Cancer cell*. 2013;24(2):167-181.
- 547 55. Kollmann K, Sexl V. CDK6 and p16INK4A in lymphoid malignancies. *Oncotarget*.  
548 2013;4(11):1858-1859.
- 549 56. Uras IZ, Maurer B, Nivarthi H, et al. CDK6 coordinates JAK2 (V617F) mutant MPN via NF-  
550 kappaB and apoptotic networks. *Blood*. 2019;133(15):1677-1690.
- 551 57. Bellutti F, Tigan AS, Nebenfuehr S, et al. CDK6 Antagonizes p53-Induced Responses during  
552 Tumorigenesis. *Cancer discovery*. 2018;8(7):884-897.
- 553 58. Uras IZ, Walter GJ, Scheicher R, et al. Palbociclib treatment of FLT3-ITD+ AML cells uncovers a  
554 kinase-dependent transcriptional regulation of FLT3 and PIM1 by CDK6. *Blood*. 2016;127(23):2890-  
555 2902.
- 556 59. Placke T, Faber K, Nonami A, et al. Requirement for CDK6 in MLL-rearranged acute myeloid  
557 leukemia. *Blood*. 2014;124(1):13-23.
- 558 60. Malumbres M, Sotillo R, Santamaria D, et al. Mammalian cells cycle without the D-type  
559 cyclin-dependent kinases Cdk4 and Cdk6. *Cell*. 2004;118(4):493-504.
- 560 61. Hoelbl A, Schuster C, Kovacic B, et al. Stat5 is indispensable for the maintenance of bcr/abl-  
561 positive leukaemia. *EMBO molecular medicine*. 2010;2(3):98-110.
- 562 62. Park HJ, Li J, Hannah R, et al. Cytokine-induced megakaryocytic differentiation is regulated by  
563 genome-wide loss of a uSTAT transcriptional program. *The EMBO journal*. 2016;35(6):580-594.
- 564 63. Dumon S, Walton DS, Volpe G, et al. Itga2b regulation at the onset of definitive  
565 hematopoiesis and commitment to differentiation. *PLoS One*. 2012;7(8):e43300-e43300.
- 566 64. de Jong R, ten Hoeve J, Heisterkamp N, Groffen J. Tyrosine 207 in CRKL is the BCR/ABL  
567 phosphorylation site. *Oncogene*. 1997;14(5):507-513.

Generation of murine HPC<sup>LSKs</sup> for functional studies

- 568 65. Daver N, Schlenk RF, Russell NH, Levis MJ. Targeting FLT3 mutations in AML: review of  
569 current knowledge and evidence. *Leukemia*. 2019;33(2):299-312.
- 570 66. Chen L, Sun Y, Wang J, Jiang H, Muntean AG. Differential regulation of the c-Myc/Lin28 axis  
571 discriminates subclasses of rearranged MLL leukemia. *Oncotarget*. 2016;7(18):25208-25223.
- 572 67. Miyawaki K, Arinobu Y, Iwasaki H, et al. CD41 marks the initial myelo-erythroid lineage  
573 specification in adult mouse hematopoiesis: redefinition of murine common myeloid progenitor.  
574 *Stem cells*. 2015;33(3):976-987.
- 575 68. Robin C, Ottersbach K, Boisset JC, Oziemlak A, Dzierzak E. CD41 is developmentally regulated  
576 and differentially expressed on mouse hematopoietic stem cells. *Blood*. 2011;117(19):5088-5091.
- 577 69. Randall TD, Weissman IL. Phenotypic and functional changes induced at the clonal level in  
578 hematopoietic stem cells after 5-fluorouracil treatment. *Blood*. 1997;89(10):3596-3606.
- 579 70. Venezia TA, Merchant AA, Ramos CA, et al. Molecular signatures of proliferation and  
580 quiescence in hematopoietic stem cells. *PLoS biology*. 2004;2(10):e301.
- 581 71. Larsson J, Blank U, Helgadottir H, et al. TGF-beta signaling-deficient hematopoietic stem cells  
582 have normal self-renewal and regenerative ability in vivo despite increased proliferative capacity in  
583 vitro. *Blood*. 2003;102(9):3129-3135.
- 584 72. Cheng T, Shen H, Rodrigues N, Stier S, Scadden DT. Transforming growth factor beta 1  
585 mediates cell-cycle arrest of primitive hematopoietic cells independent of p21(Cip1/Waf1) or  
586 p27(Kip1). *Blood*. 2001;98(13):3643-3649.
- 587 73. Lebkowski JS, Schain LR, Okarma TB. Serum-free culture of hematopoietic stem cells: a  
588 review. *Stem cells*. 1995;13(6):607-612.
- 589 74. Soma T, Yu JM, Dunbar CE. Maintenance of murine long-term repopulating stem cells in ex  
590 vivo culture is affected by modulation of transforming growth factor-beta but not macrophage  
591 inflammatory protein-1 alpha activities. *Blood*. 1996;87(11):4561-4567.
- 592 75. Iwasaki H, Akashi K. Myeloid lineage commitment from the hematopoietic stem cell.  
593 *Immunity*. 2007;26(6):726-740.
- 594 76. Richter K, Pinto do OP, Hagglund AC, Wahlin A, Carlsson L. Lhx2 expression in hematopoietic  
595 progenitor/stem cells in vivo causes a chronic myeloproliferative disorder and altered globin  
596 expression. *Haematologica*. 2003;88(12):1336-1347.
- 597 77. Sahin AO, Buitenhuis M. Molecular mechanisms underlying adhesion and migration of  
598 hematopoietic stem cells. *Cell adhesion & migration*. 2012;6(1):39-48.

599

600

601

Generation of murine HPC<sup>LSKs</sup> for functional studies

## 602 **FIGURE LEGENDS**

### 603 **Figure 1: Establishing murine hematopoietic progenitor HPC<sup>LSK</sup> lines**

604 (a) Schematic workflow of HPC<sup>LSK</sup> cell line establishment. LSKs were sorted from murine  
605 BM, transfected with *Lhx2* including a puromycin selection marker and kept in SCF and IL-6  
606 on agarose-coated plates. StemPro-34 SFM: serum free media, IMDM: Iscove's Modified  
607 Dulbecco's Media, SCF: stem cell factor.

608 (b) Principal component analysis of the expression profiles of HPC<sup>LSKs</sup> (n=3) compared to  
609 murine HSCs (batch-corrected top500 variance genes are plotted).

610 (c) Immunoblot of lysates from 3h-starved HPC<sup>LSK</sup> cells followed by treatment with IL-7,  
611 EPO, TPO, GMCSF, SCF, IL-6 or IL-3 (100ng/ml each) for 15 min. The presence of total and  
612 phosphorylated STAT5, STAT3, AKT and ERK was detected. HSC70 serves as a loading  
613 control. st: starved. A representative blot of two independent experiments is shown.

614 (d) Colonies with different morphologies were counted. Seeding density of 1 250 HPC<sup>LSKs</sup> or  
615 240 000 BM cells/35-mm-dish. Error bars represent mean±SD, n≥3.

616 (e) Images of colonies formed by HPC<sup>LSK</sup> cells 10 days after cytokine cocktail treatment  
617 (EPO, GMCSF, IL-7, SCF, IL-6, IL-3) in semi-solid methylcellulose gels. BFU-E: burst-  
618 forming unit-erythroid, CFU-GM: colony-forming unit-granulocyte macrophage, CFU-  
619 GEMM: CFU-granulocyte erythrocyte monocyte megakaryocyte.

620

### 621 **Figure 2: HPC<sup>LSK</sup> cell lines can repopulate the hematopoietic system**

622 (a) Experimental scheme: Ly5.1<sup>+</sup> recipient mice were lethally irradiated (10 Gy) 24 h prior to  
623 *i.v.* injection of 1x10<sup>7</sup> Ly5.2<sup>+</sup> BM (positive control), BM-HPC5 or HPC<sup>LSK</sup> cells. 40 days  
624 later, some mice of BM- and HPC<sup>LSK</sup> -injected group were terminated and hematopoietic  
625 organs were analyzed. The remaining injected mice were analyzed for their long-term  
626 survival.



Generation of murine HPC<sup>LSKs</sup> for functional studies

627 (b) Survival of BM- (n=7), BM-HPC5- (n=8) and HPC<sup>LSKs</sup>- (n=10) injected mice compared to  
628 irradiation control (n=9), Log-rank (Mantel-Cox) Test \*\*\* $P < 0.0001$ .

629 (c) WBC and RBC in peripheral blood of BM- and HPC<sup>LSK</sup>-injected recipients were  
630 compared 40 days after treatment. Data are presented as mean $\pm$ SEM (\* $P < 0.01$ , Student t-test  
631 or Mann Whitney test for platelets) in 6-12 mice/group.

632 (d) Comparison of Ly5.2<sup>+</sup> BM versus HPC<sup>LSK</sup> cells' engraftment in the blood, BM, spleen and  
633 thymus of lethally irradiated Ly5.1<sup>+</sup> mice after 40 days. Data are presented as mean $\pm$ SD,  $n \geq 4$ .

634 (e) Spleen weights of mice 40 days after lethally irradiation and BM- or HPC<sup>LSK</sup>-injection.  
635 Data represent mean $\pm$ SD,  $n \geq 5$ .

636 (f) Composition of the engrafted Ly5.2<sup>+</sup> HPC<sup>LSK</sup> cells in blood, BM and thymus after 40 days.  
637 ST-HSC; MPP (Lin<sup>-</sup>, Sca-1<sup>+</sup>, c-Kit<sup>+</sup>, CD150<sup>-</sup>, CD48<sup>+</sup>), LSKs, MCP (myeloid committed  
638 progenitor, Lin<sup>-</sup>, IL-7R<sup>-</sup>, Sca-1<sup>-</sup>, c-Kit<sup>+</sup>), GMP (granulocyte-monocyte progenitor, Lin<sup>-</sup>, IL-7R<sup>-</sup>  
639 , Sca-1<sup>-</sup>, c-Kit<sup>+</sup>, CD16/32<sup>+</sup>, CD34<sup>+</sup>), CMP (common myeloid progenitor, Lin<sup>-</sup>, IL-7R<sup>-</sup>, Sca-1<sup>-</sup>,  
640 c-Kit<sup>+</sup>, CD16/32<sup>-</sup>, CD34<sup>+</sup>), MEP (megakaryocyte-erythrocyte progenitor, Lin<sup>-</sup>, IL-7R<sup>-</sup>, Sca-1<sup>-</sup>,  
641 c-Kit<sup>+</sup>, CD16/32<sup>-</sup>, CD34<sup>-</sup>), CLP (common lymphoid progenitor, Lin<sup>-</sup>, IL7-R<sup>+</sup>, c-Kit<sup>mid</sup>, Sca-  
642 1<sup>mid</sup>); and *in vivo*-differentiated populations: erythroblast (CD71/CD44<sup>+</sup>), granulocyte (Gr-1<sup>+</sup>),  
643 monocyte (CD11b<sup>+</sup>), eosinophil/neutrophil (Gr-1/CD11b<sup>+</sup>), T cell (CD4 or CD8<sup>+</sup>) and B cell  
644 (B220<sup>+</sup>) are depicted as fold change compared to BM-injected mice.  $n = 6-12$  per group, \* $P$   
645  $< 0.05$ ; \*\* $P < 0.01$ ; \*\*\* $P < 0.001$  by Student *t*-test.

646

647 **Figure 3: Successful generation of leukemic HPC<sup>LSK</sup> cell lines with various oncogenes**

648 (a) Experimental design: HPC<sup>LSK</sup> cell lines were retrovirally transduced with different  
649 oncogenes.

650 (b) Immunoblot showing increase of CRKL, FLT3, JAK2, STAT5, ERK, and AKT  
651 phosphorylation and upregulation of cABL, c-MYC and p53 in transformed HPC<sup>LSK</sup> cells

Generation of murine HPC<sup>LSKs</sup> for functional studies

652 compared to untransformed (-) cells to the corresponding oncogenes. HSC70 serves as a  
653 loading control. Representative blot from at least three independent experiments is shown.

654 (c) Flow cytometry analysis of untransformed and BCR/ABL<sup>p210</sup> transformed HPC<sup>LSK</sup> cells in  
655 IMDM/SCF/IL-6 and SCF/IL-6-deprived medium (IMDM). After one month in culture,  
656 HPC<sup>LSK</sup> BCR/ABL<sup>p210</sup> cells show reduced expression of stem cell markers (c-Kit, Sca-1) and  
657 differentiate into myeloid(CD11b, Gr-1), but not lymphoid (CD19, CD3) cells as indicated by  
658 the numbers in quadrants. The data are expressed as mean±SD of 3 independent  
659 measurements.

660 (d) Representative flow cytometry plots of LSK (upper panel), myeloid (middle panel) and  
661 lymphoid staining (lower panel) of MLL-AF9 (in the presence of SCF and IL-6), Flt3-  
662 ITD;Nras<sup>G12D</sup> and BCR/ABL<sup>p185</sup> transformed HPC<sup>LSK</sup> and pre-pro-B BCR/ABL<sup>p185</sup> cell lines  
663 in the absence of SCF and IL-6.

664

#### 665 **Figure 4: *In vivo* lymphoid and myeloid leukemia model**

666 (a) Left: Schematic representation of the experimental setup; Oncogene-expressing HPC<sup>LSK</sup>  
667 cell lines were injected *i.v.* in NSG recipients and moribund mice were analyzed. Healthy  
668 HPC<sup>LSK</sup>-injected animals were sacrificed and examined after 150 days. Right: Disease-free  
669 survival following *i.v.* injection of 2x10<sup>6</sup> HPC<sup>LSK</sup> BCR/ABL<sup>p210</sup> (n=9), or 5x10<sup>6</sup> HPC<sup>LSK</sup>  
670 MLL-AF9 (n=7), HPC<sup>LSK</sup> Flt3-ITD;NRas<sup>G12D</sup> (n=5) and HPC<sup>LSK</sup> BCR/ABL<sup>p185</sup> (n=9) cells  
671 compared to injection of 5x10<sup>6</sup> non-transformed HPC<sup>LSK</sup> cells (n=5).

672 (b) WBC count of moribund mice, One-way ANOVA (Kruskal-Wallis test) with Dunn's  
673 Multiple Comparison Test, \*P<0.05. Data are presented as mean±SEM.

674 (c) Detection of transformed GFP<sup>+</sup> HPC<sup>LSK</sup> cells (with the respective oncogene) in blood,  
675 spleen and BM of diseased NSG recipients. Data represent mean±SD in 4-8 mice/group.

Generation of murine HPC<sup>LSKs</sup> for functional studies

676 (d) Top: Representative blood smears from transformed HPC<sup>LSK</sup>-injected mice shows  
677 leukocytosis with circulating blasts (hematoxylin-eosin, original magnification x400).  
678 Bottom: Macroscopic view of representative spleens from transformed HPC<sup>LSK</sup>-injected  
679 recipient mice compared to non-transformed HPC<sup>LSK</sup>-injected mice, n≥5. Scale bar: 1 cm.  
680 (e) Left: Quantification of the transformed GFP<sup>+</sup> LSKs and differentiated cells (CD19<sup>+</sup> B cells  
681 and CD11b<sup>+</sup> myeloid cells) by flow cytometry in spleens of diseased NSG recipient mice.  
682 Error bars represent the mean±SD, n=4-8 per oncogene. Right: Representative flow cytometry  
683 plots for myeloid (CD11b and Gr-1) and lymphoid (CD19 and CD3 or B220) cells of spleens  
684 of the diseased mice injected with different oncogene-expressing HPC<sup>LSKs</sup>.

685

686 **Figure 5: Generation of HPC<sup>LSK</sup> lines from *Cdk6*<sup>-/-</sup> mice**

687 (a) Cell proliferation curve of *Cdk6*<sup>+/+</sup> and *Cdk6*<sup>-/-</sup> HPC<sup>LSK</sup> lines. Data are presented as  
688 mean±SEM of 3 different cell lines per genotype.

689 (b) Colony formation assay of *Cdk6*<sup>+/+</sup> and *Cdk6*<sup>-/-</sup> BCR/ABL<sup>p210</sup> HPC<sup>LSKs</sup>. Representative  
690 macroscopic images of colonies formed within 7 days in semi-solid methylcellulose gels  
691 without cytokines are depicted. Data are presented as mean±SEM of two independent  
692 experiments with 2-3 different cell lines per genotype.

693 (c) Top: Schematic representation of the experimental setup; Bottom: *Cdk6*<sup>+/+</sup> and *Cdk6*<sup>-/-</sup>  
694 BCR/ABL<sup>p210</sup> HPC<sup>LSKs</sup> have been injected *i.v.* in NSG recipient mice. Disease-free survival  
695 following *i.v.* injection of 1x10<sup>6</sup> *Cdk6*<sup>+/+</sup> (n=9, 3 different cell lines per genotype) and *Cdk6*<sup>-/-</sup>  
696 BCR/ABL<sup>p210</sup> HPC<sup>LSKs</sup> (n=7, 3 different cell lines per genotype). Statistical differences were  
697 calculated using the log-rank test (\*\*\*\*, P < 0.0001); (d) Quantification of BCR/ABL<sup>p210</sup>  
698 GFP<sup>+</sup> cells by flow cytometry in BM and spleen of diseased NSG recipient mice. Error bars  
699 represent mean±SEM (n=7-9 per group, 3 different cell lines; \*P < 0.05 by Student *t*-test).

700

Generation of murine HPC<sup>LSKs</sup> for functional studies

701 **Figure 6: CDK6 dependent transcriptomic alterations**

702 (a) Volcano plots summarizing Cdk6-mediated differential gene expression between  
703 untransformed (left) and BCR/ABL<sup>p210</sup> (right) HPC<sup>LSKs</sup>. Each dot represents a unique gene,  
704 red dots indicate statistically significant deregulated genes (FDR<0.05 and FC±1.5). FDR,  
705 false discovery rate; FC, fold change. (b) Venn diagrams showing overlaps between  
706 upregulated genes (upper panel) or downregulated genes (lower panel) in untransformed and  
707 *Cdk6*<sup>-/-</sup> BCR/ABL<sup>p210</sup> HPC<sup>LSKs</sup>. (c) Gene Ontology enrichment analyses of Cdk6 regulated  
708 genes in untransformed (left) and BCR/ABL<sup>p210</sup> (middle) HPC<sup>LSKs</sup> and of commonly Cdk6  
709 regulated genes in these cell types (right). (d) Heatmaps summarizing expression of 101 genes  
710 which are commonly regulated in a CDK6-dependent manner in murine and human  
711 BCR/ABL<sup>p210</sup> cells. Each row represents a unique gene and each column represents a unique  
712 sample. Colors range from blue (low expression) to red (high expression). Results from Gene  
713 Ontology enrichment analyses of these genes are shown in the bar chart (right).

714

715 **Figure 7: CDK6 is required for homing to the bone marrow of BCR/ABL<sup>p210</sup> HPC<sup>LSKs</sup>**

716 (a) Sytox staining for apoptotic cells of BCR/ABL<sup>p210</sup> HPC<sup>LSKs</sup> starved for 90 min in 0,5%  
717 FCS medium. Numbers represent mean±SD (n=3 different cell lines per genotype; \*P <0.05  
718 by Student *t*-test.). (b) qPCR validation of RNA-Seq data of the target gene *Csf3r* (mean±  
719 SEM; n=3 different cell lines per genotype; \*P <0.05 by Student *t*-test.) (c) Mean  
720 fluorescence intensity (MFI) of myeloid markers (CD11b, Gr-1) of BCR/ABL<sup>p210</sup> HPC<sup>LSKs</sup>  
721 (mean± SEM; n=3 different cell lines per genotype; \*P <0.05 by Student *t*-test) (d) Validation  
722 of 4 selected genes (*Gp1ba*, *Pik3r6*, *Itgb6*, *Fzd6*) found deregulated in GO analysis of the  
723 RNA-Seq experiment by qPCR and nested qPCR. (mean± SEM; n=3 different cell lines per  
724 genotype; \*P <0.05 by Student *t*-test) (e) Upper part: Experimental scheme of BCR/ABL<sup>p210</sup>  
725 HPC<sup>LSKs</sup> homing assay in wild type recipient mice; Bottom: Percentage of BCR/ABL<sup>p210</sup>

Generation of murine HPC<sup>LSKs</sup> for functional studies

726 GFP<sup>+</sup> HPC<sup>LSKs</sup> in spleen and BM detected by flow cytometry are shown. (mean± SEM; n=4-7  
727 per group, two-three independent cell lines, \**P* <0.05 by Student *t*-test)

728

## 729 SUPPLEMENTARY FIGURE LEGENDS

730

### 731 **Supplementary Figure 1: Comparison of HPC<sup>LSK</sup> cell line with other *Lhx2*-immortalized murine** 732 **hematopoietic progenitor cell lines**

733 (a) Representative plots of HPC<sup>LSK</sup> cell line for Sca-1, c-Kit, CD135, CD34, CD150 and CD48. LSK  
734 population that contains hematopoietic stem cells: HSC, MPP1, MPP2, MPP3 and MPP4; One  
735 representative example is depicted. All data represent mean±SD of five HPC<sup>LSK</sup> cell line  
736 establishments.

737 (b) Heatmap of batch-corrected top500 variance genes of RNA-expression profiles of HPC<sup>LSKs</sup> (n=3)  
738 compared to murine HSCs.

739 (c) Light microscopy picture of cultured HPC<sup>LSKs</sup> (Cytospin stained with haematoxylin/eosin), scale  
740 bar depicts 20 μm.

741 (d) Representative myeloid (CD11b, Gr-1) and lymphoid (CD19, CD3) flow cytometry plots of  
742 HPC<sup>LSK</sup> cell line. All data represent mean±SD of four HPC<sup>LSK</sup> cell line establishments.

743 (e) HSC staining of ES-derived HPC-7, BM-HPC5 and BM-HPC9 cell lines. Cells were gated on  
744 lineage–negative, c-Kit and Sca-1 positive, and stained for CD150 and CD48.

745 (f) Immunoblot analysis of lysates from HPC-7, BM-HPC5 and BM-HPC9 cell lines. Samples were  
746 starved for 3 h, then treated with IL-7, GMCSF, EPO, TPO, SCF, IL-6 or IL-3 (100 ng/ml each) for 15  
747 min and blotted for phosphorylated STAT5, STAT3, AKT and ERK. GAPDH serves as a loading  
748 control. Representative blot from three independent experiments. st, starved.

749 (g) Representative macroscopic pictures and flow cytometry analysis of colonies formed by BM and  
750 HPC<sup>LSK</sup> cells in cytokine cocktail supplemented methylcellulose gel. The numbers in quadrants  
751 indicate the percentage of erythroid Ter119/CD71<sup>+</sup>, myeloid CD11b/Gr-1<sup>+</sup> and lymphoid B220/CD93<sup>+</sup>  
752 B cells after 10 days. The data are expressed as the mean±SD of 3 independent experiments.

Generation of murine HPC<sup>LSKs</sup> for functional studies

753 (h) Macroscopic, number of colonies and (i) microscopic images of colonies on methylcellulose gels  
754 formed by BM-HPC5 and HPC-7 cells 10 days after a cytokine cocktail treatment (EPO, GM-CSF, IL-  
755 7, SCF, IL-6, IL-3). Primitive erythroid progenitor (BFU-E), multipotential progenitor (CFU-GEMM),  
756 lymphoid (CFU-preB) and myeloid (CFU-GM) progenitor colonies were counted. Seeding density of  
757 1 250 cells/35-mm-dish. Error bars represent mean±SD, n=3.

758 (j) Flow cytometry analysis of HPC-7 and BM-HPC5 cells upon colony formation in cytokine  
759 cocktail-supplemented methylcellulose gel. The bars indicate the percentage CD19<sup>+</sup> B cells, CD11b<sup>+</sup>  
760 myeloid cells and Ter119<sup>+</sup> erythroid cells after 10 days. Data represent mean±SD, n=3.

761

762 **Supplementary Figure 2: *In vivo* differentiation of HPC<sup>LSK</sup> cell lines**

763 (a) WBC and RBC values of 5 mice were followed after lethal irradiation (10 Gy) and 1x10<sup>7</sup> HPC<sup>LSKs</sup>  
764 injection for 26 weeks.

765 (b) Top: Experimental scheme: Ly5.1<sup>+</sup> recipient mice were lethally irradiated 24 h prior to *i.v.*  
766 injection of different (1-10×10<sup>6</sup>) numbers of Ly5.2<sup>+</sup> HPC<sup>LSK</sup> cells. Bottom: Long-term survival, n =  
767 4/group;

768 (c) Absolute numbers of WBC and RBC of mice injected with 1-10×10<sup>6</sup> HPC<sup>LSK</sup> cells were compared  
769 40 days after transplantation. Bars represent mean±SD, n≥3.

770

771 **Supplementary Figure 3: Oncogenic transformation of HPC<sup>LSK</sup> cell lines**

772 (a) Representative macroscopic pictures of dishes and colony counts of methylcellulose gels formed  
773 by oncogene-transformed HPC<sup>LSK</sup> cells with or without SCF 10 days after seeding, density of 1 250  
774 cells/35-mm-dish. Data represent mean±SD, n=3, Two-way ANOVA with Bonferroni post-test,  
775 \*\*P<0.01.

776

777 **Supplementary. Figure 4: Characterization of transformed HPC<sup>LSK</sup>-induced leukemia**

778 (a) Spleen weights of moribund transformed HPC<sup>LSK</sup> recipients. One-way ANOVA with Bonferroni's  
779 Multiple Comparison Test (\*P<0.05, \*\*P<0.01, \*\*\*P<0.001). Error bars represent mean±SEM.

Generation of murine HPC<sup>LSKs</sup> for functional studies

780 (b) Quantification of transformed GFP<sup>+</sup> LSKs and differentiated cells (CD19<sup>+</sup> B cells and CD11b<sup>+</sup>  
781 myeloid cells) by flow cytometry in the blood of diseased NSG recipient mice. Error bars represent the  
782 mean±SD. n=4-8 per oncogene.

783 (c) Representative blood flow cytometry plots (myeloid CD11b and Gr-1 and lymphoid CD19 and  
784 CD3 or B220 staining) of the diseased mice injected with different oncogene-expressing HPC<sup>LSKs</sup>.

785 (d) Quantification of transformed GFP<sup>+</sup> LSKs and differentiated cells (CD19<sup>+</sup> B cells and CD11b<sup>+</sup>  
786 myeloid cells) by flow cytometry in the BM of diseased NSG recipient mice. Error bars represent  
787 mean±SD. n=4-8 per oncogene.

788

789 **Supplementary Figure S5: Validation of transgenic HPC<sup>LSK</sup> *Cdk6*<sup>-/-</sup> cell line under physiological**  
790 **conditions and transformation**

791 (a) Immunoblot for CDK6 and CDK4 of three untransformed *Cdk6*<sup>+/+</sup> and *Cdk6*<sup>-/-</sup> HPC<sup>LSK</sup> lines.  
792 HSC70 serves as a loading control.

793 (b) Fold change of % living cells of the cell proliferation curve of *Cdk6*<sup>+/+</sup> and *Cdk6*<sup>-/-</sup> HPC<sup>LSKs</sup> at day  
794 2 and 4. The data is presented as mean±SEM of 3 independent cell lines/genotype.

795 (c) Analysis of transformed GFP<sup>+</sup> LSKs (Gr1/CD11b<sup>+</sup> myeloid cells) by flow cytometry after cytokine  
796 removal for 2 weeks. The data are presented as mean±SEM of 2-3 independent cell lines/genotype and  
797 two independent experiments.

798 (d) Left: Representative flow cytometry plots of BCR/ABL<sup>p210</sup> HPC<sup>LSK</sup> colonies in the absence of SCF  
799 and IL-6 for myeloid lineage markers (CD11b and Gr-1). Right: Flow cytometry analysis of *Cdk6*<sup>+/+</sup>  
800 and *Cdk6*<sup>-/-</sup> BCR/ABL<sup>p210</sup> HPC<sup>LSK</sup> colonies after 7 days in semi-solid methylcellulose culture for the  
801 myeloid lineage (CD11b, Gr-1), B-cell lineage (CD19) and T-cell lineage (CD3). Data represent  
802 mean±SEM, n=4-8/genotype.

803 (e) Spleen and body weights were measured on the day of sacrifice and spleen/body weight ratio was  
804 calculated. The data is presented as mean±SEM, n=7-9/genotype.

805 (f) Quantification of transformed GFP<sup>+</sup> LSKs by flow cytometry in blood of diseased NSG recipient  
806 mice. Error bars represent mean±SEM. n=7-9 per group; *p* = <0.055 by Student *t*-test.

807

# Figure 1

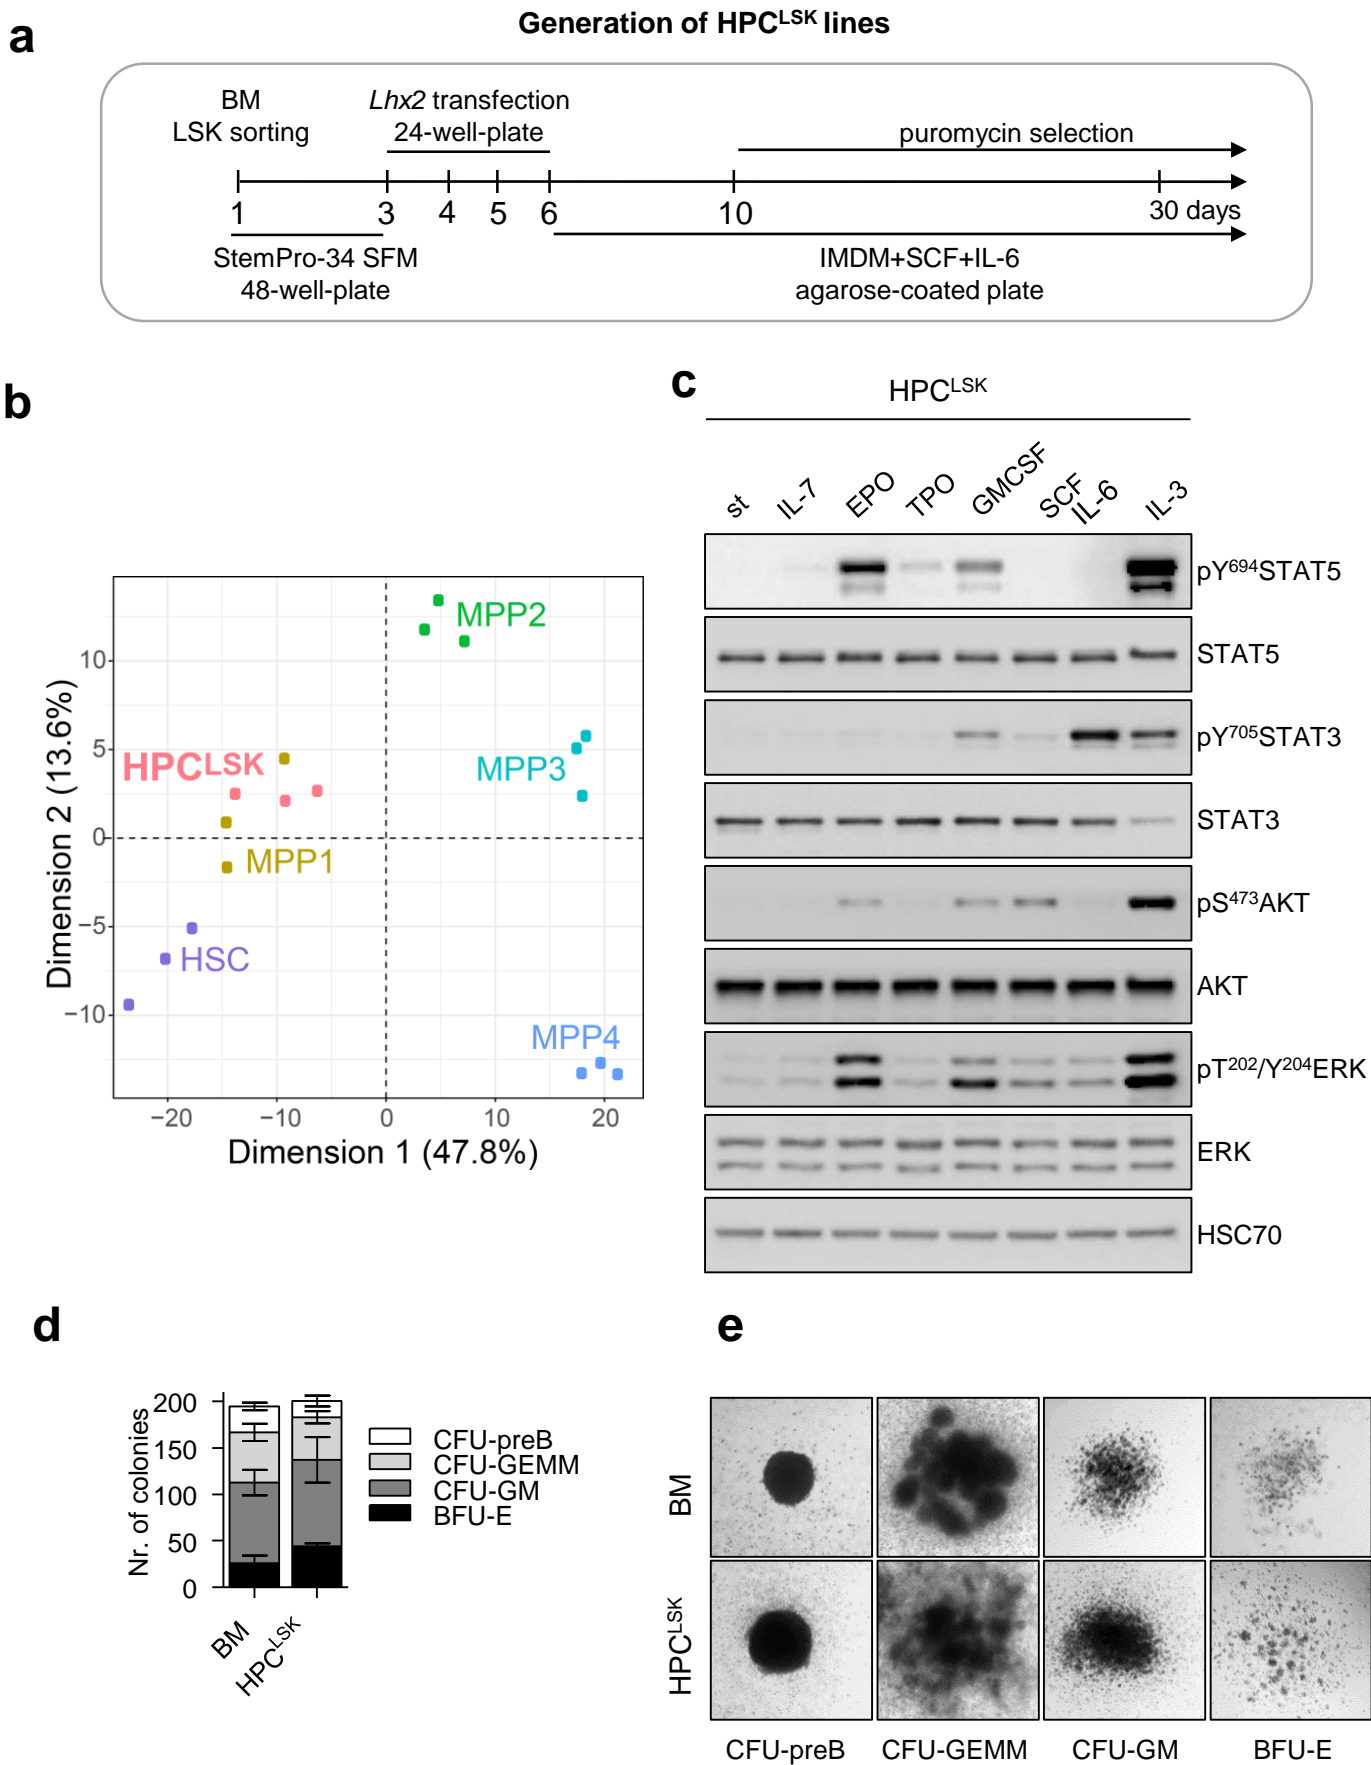



# Suppl. Figure 1

**a**

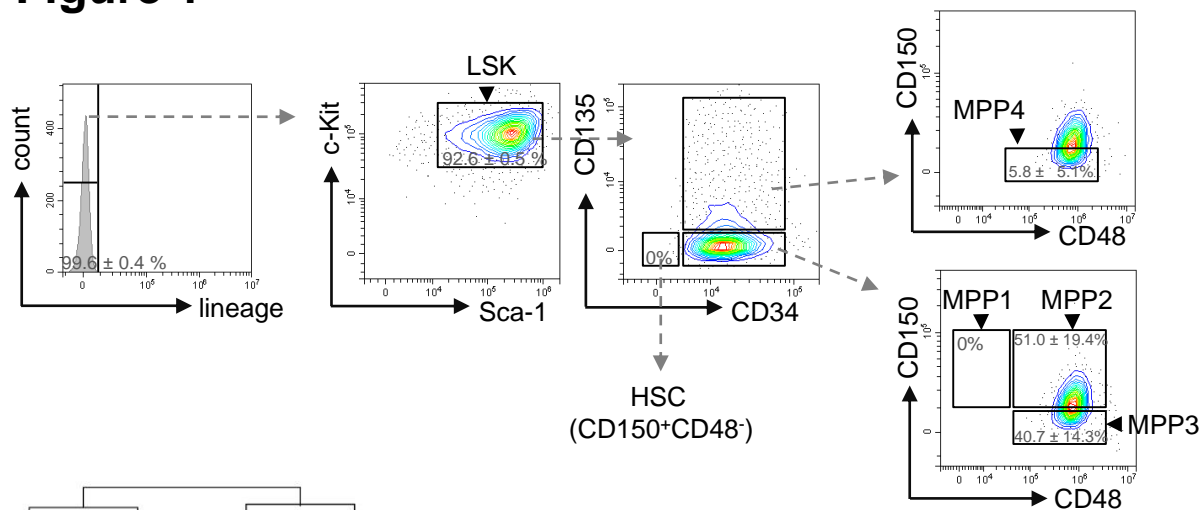

**b**

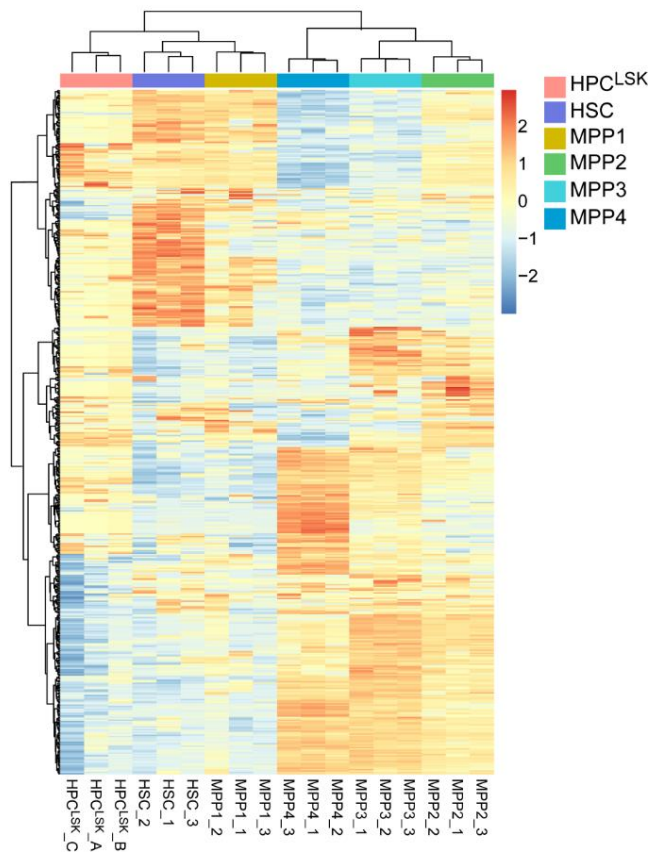

**c**

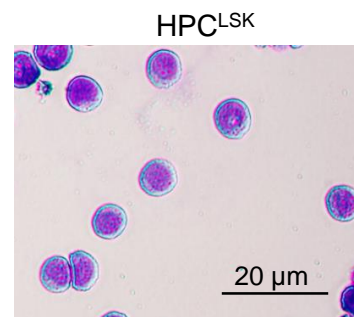

**d**

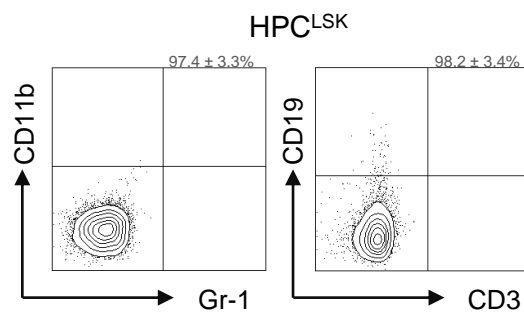

**e**

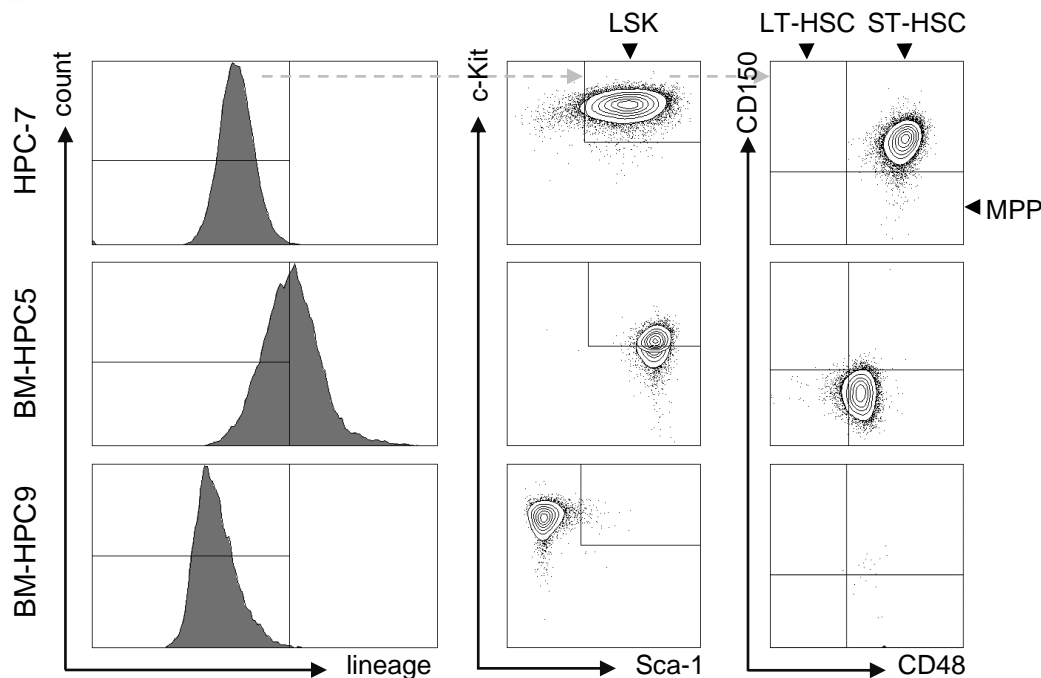

# Suppl. Figure 1

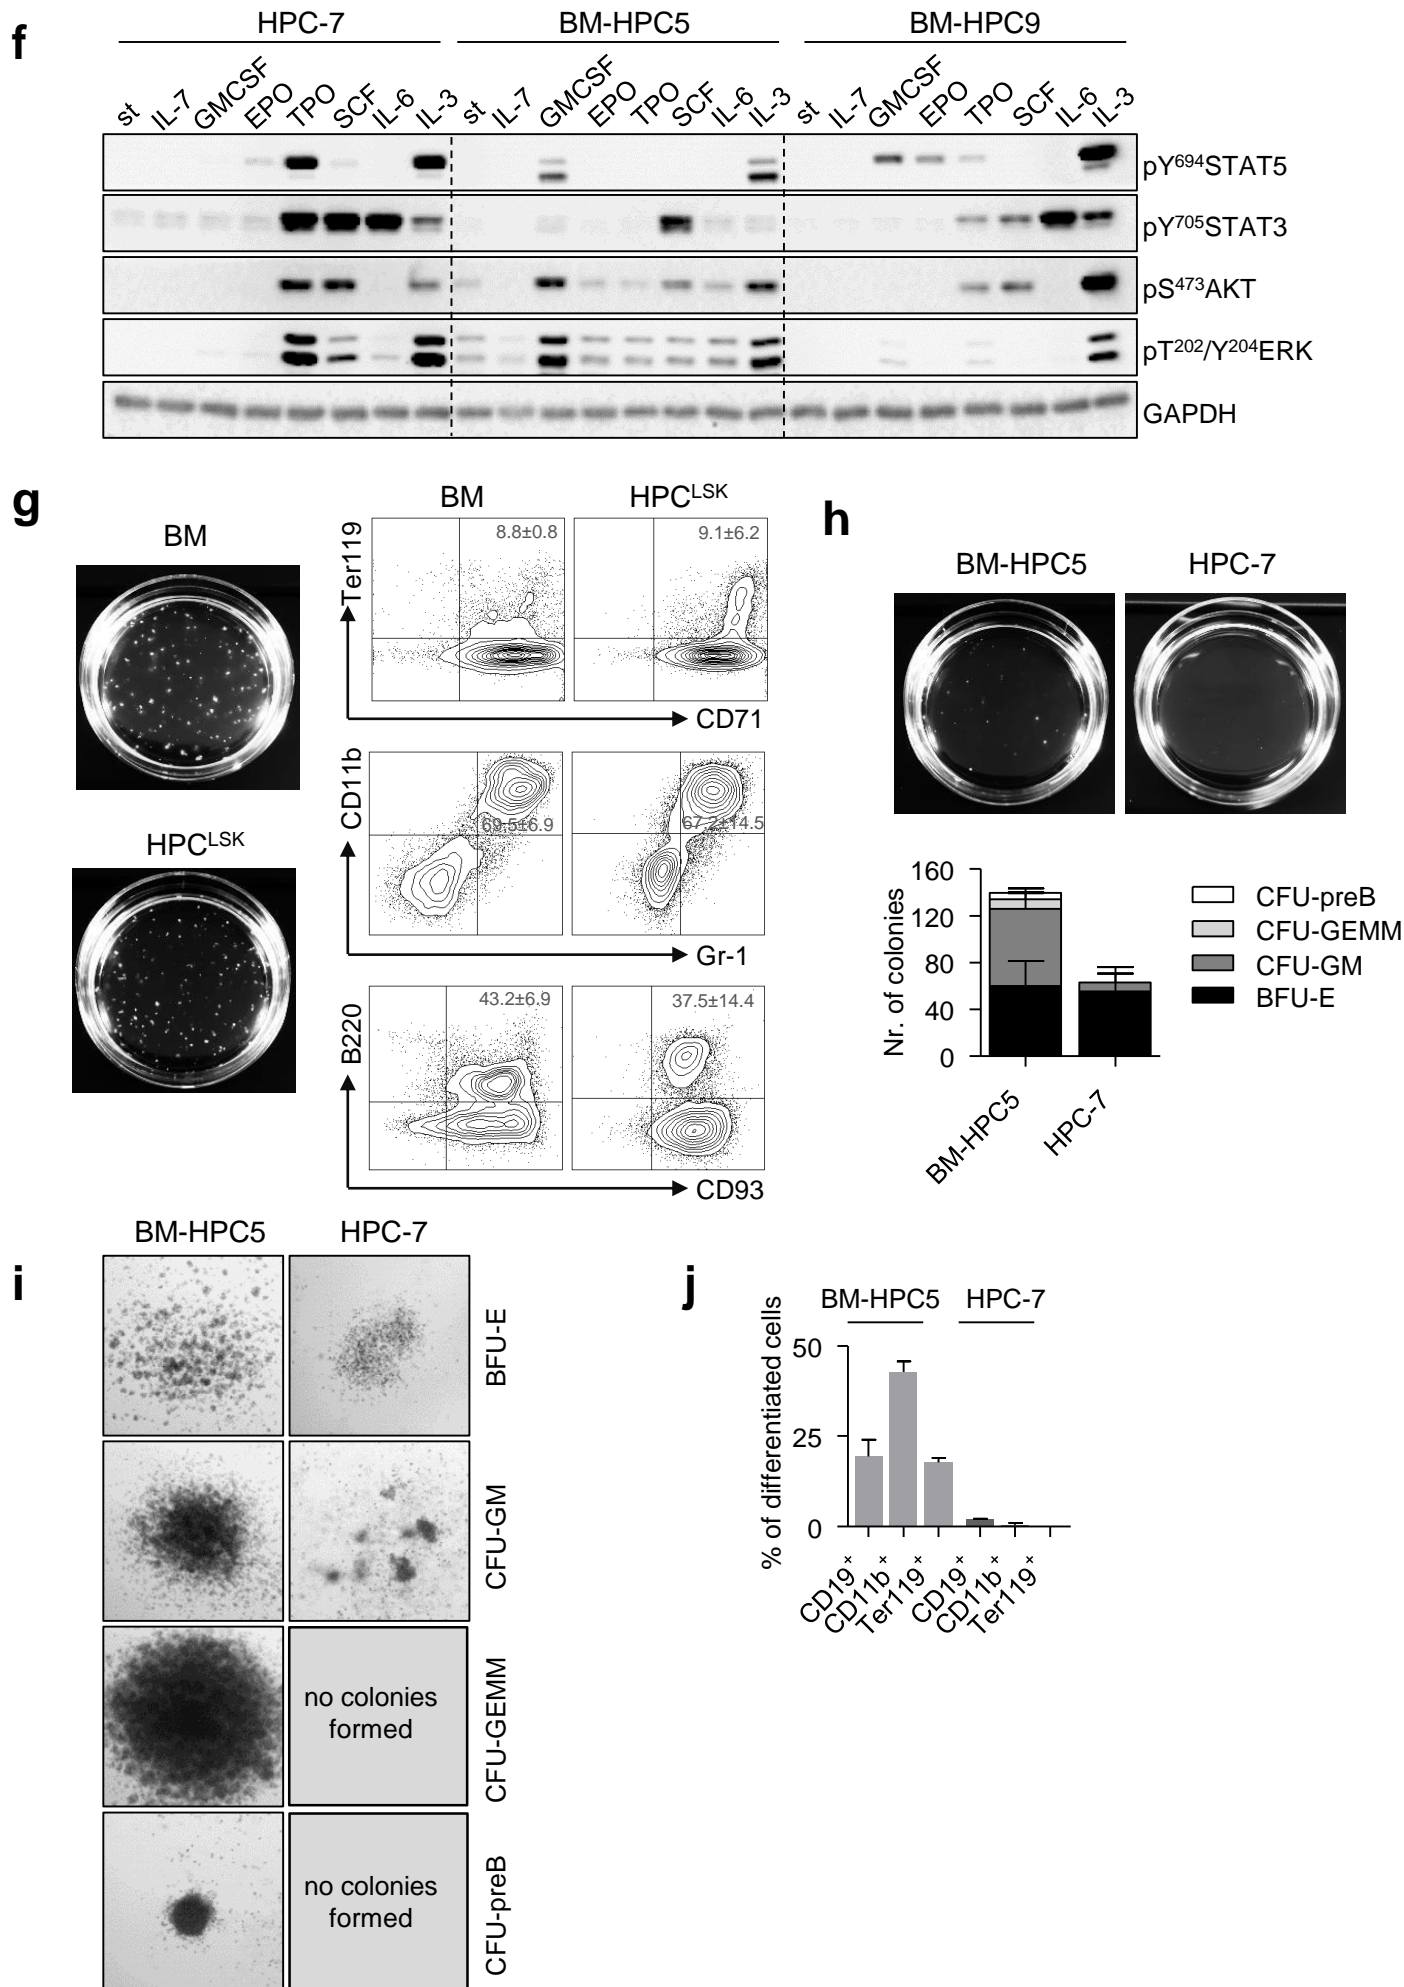

## Figure 2

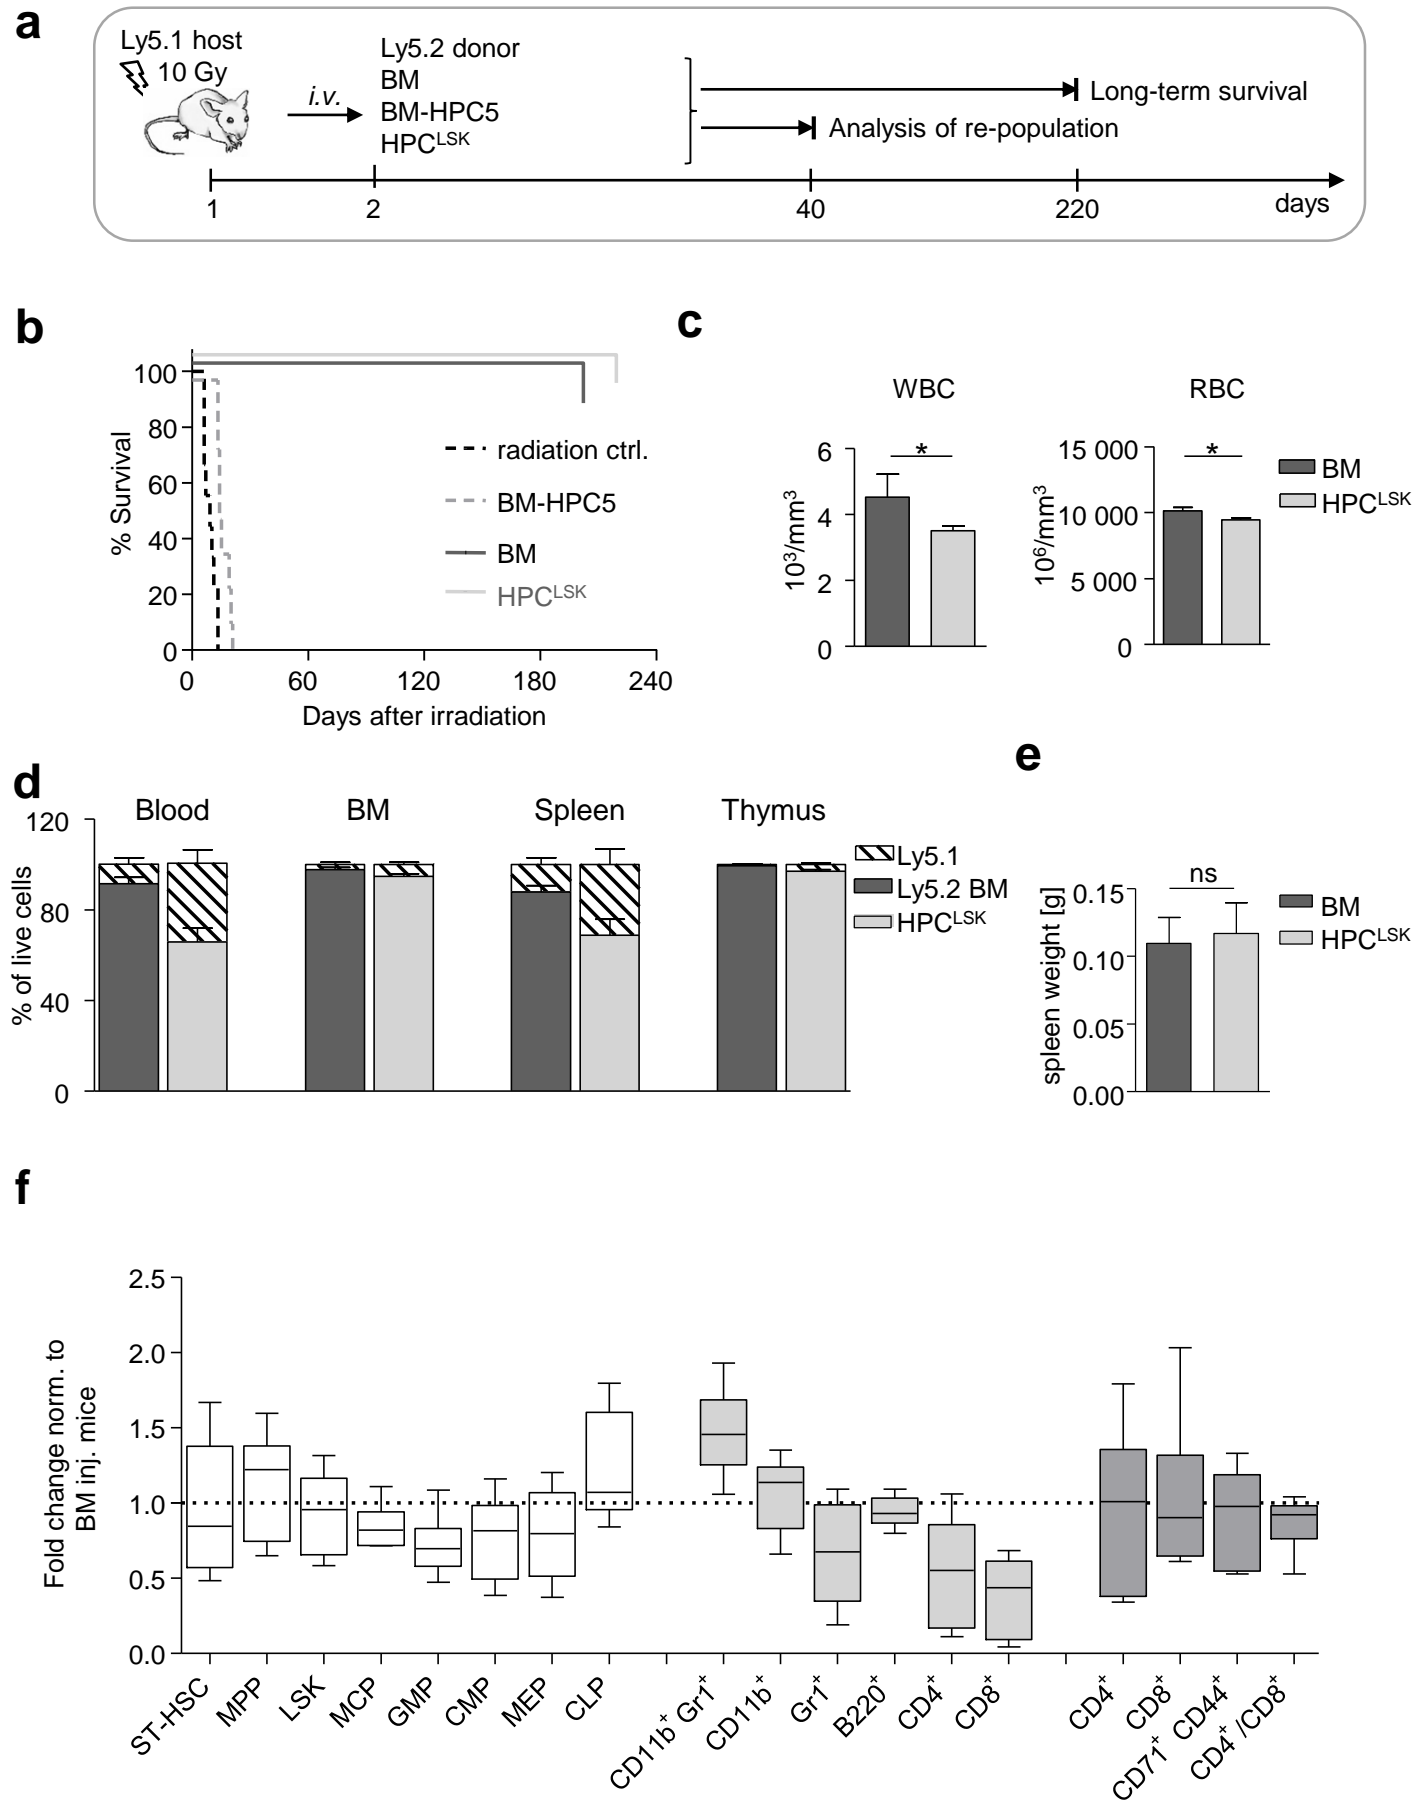

# Suppl. Figure 2

**a**

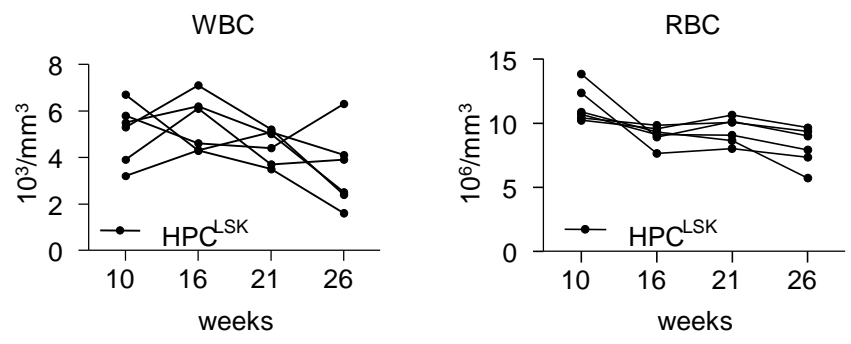

**b**

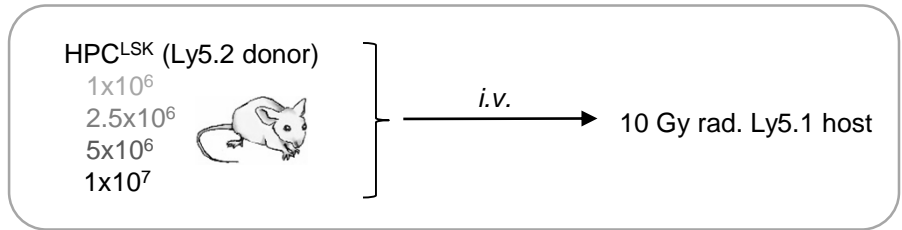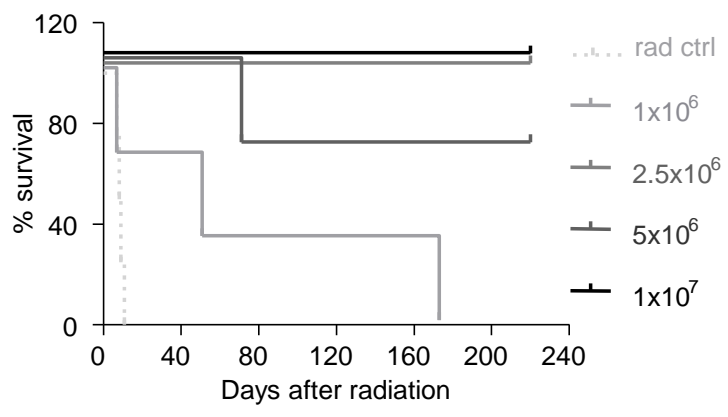

**c**

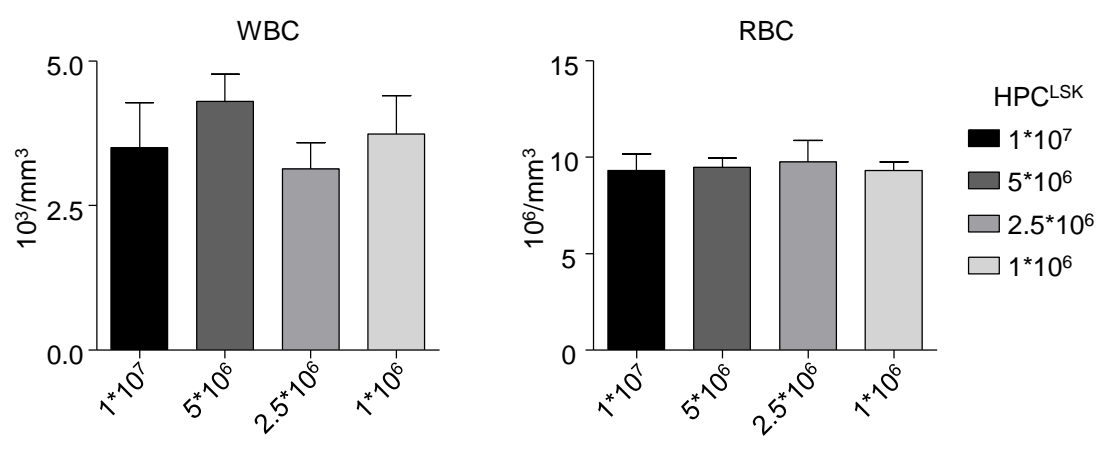

# Figure 3

**a**

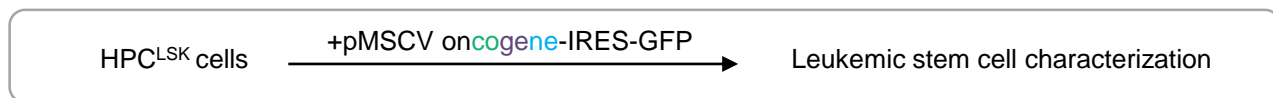

**b**

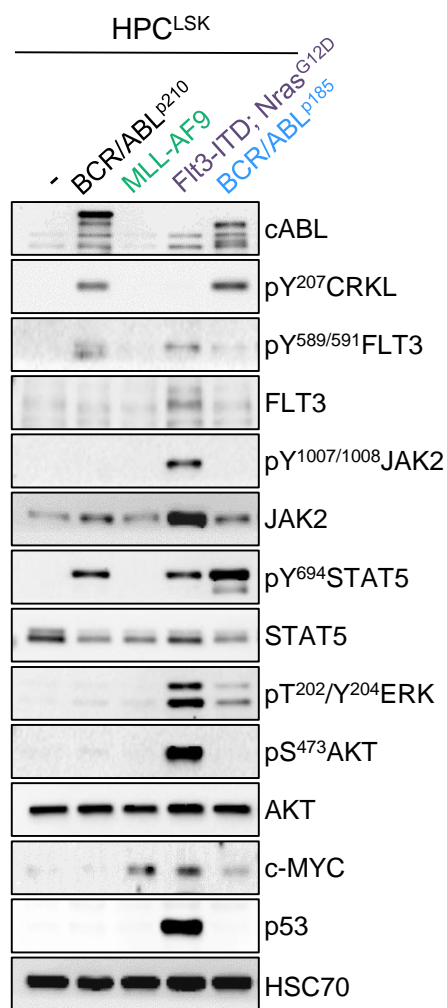

**c**

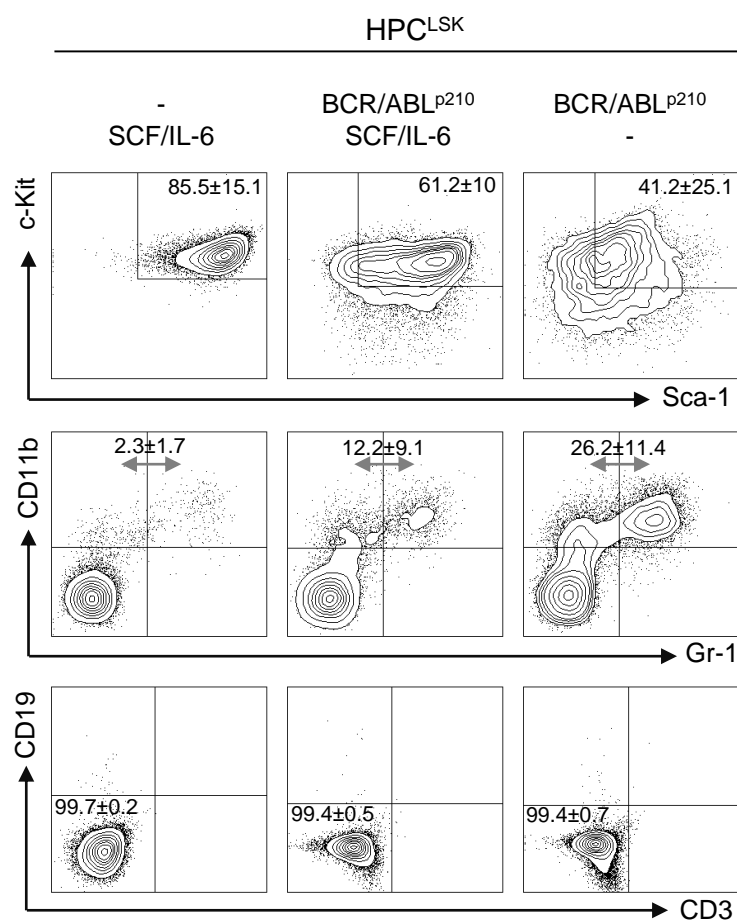

**d**

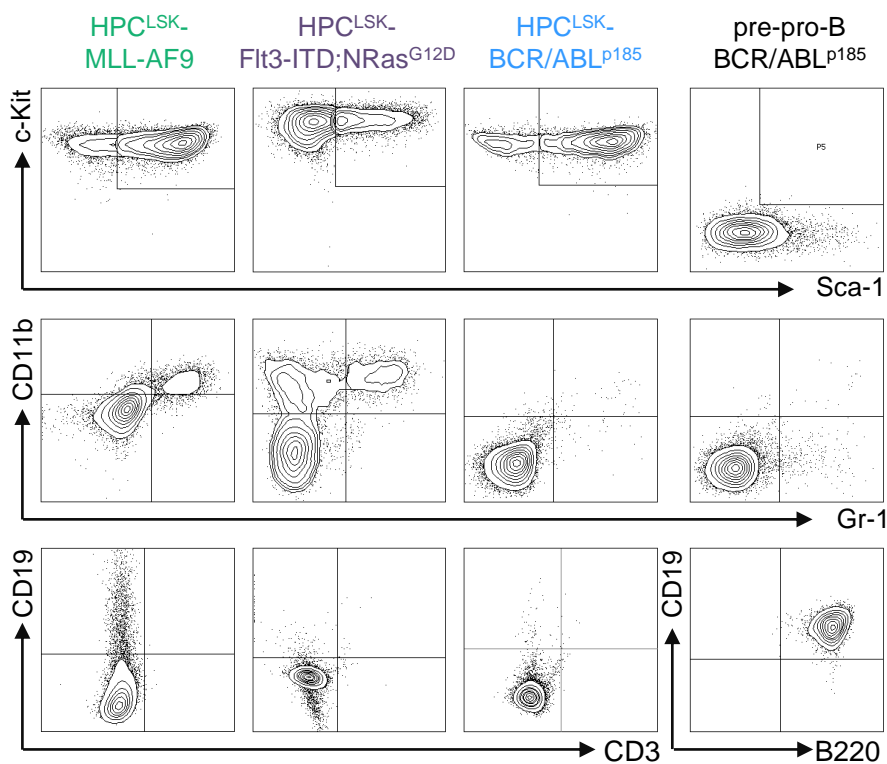

# Suppl. Figure 3

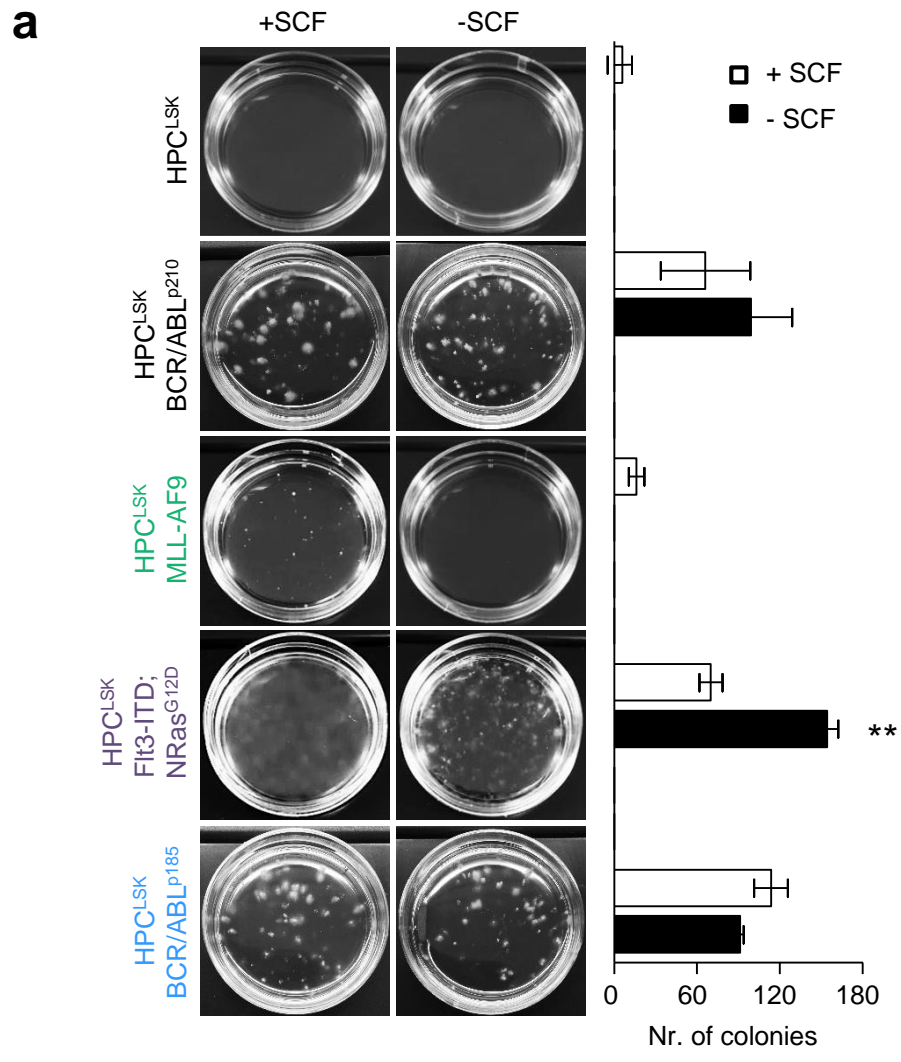

# Figure 4

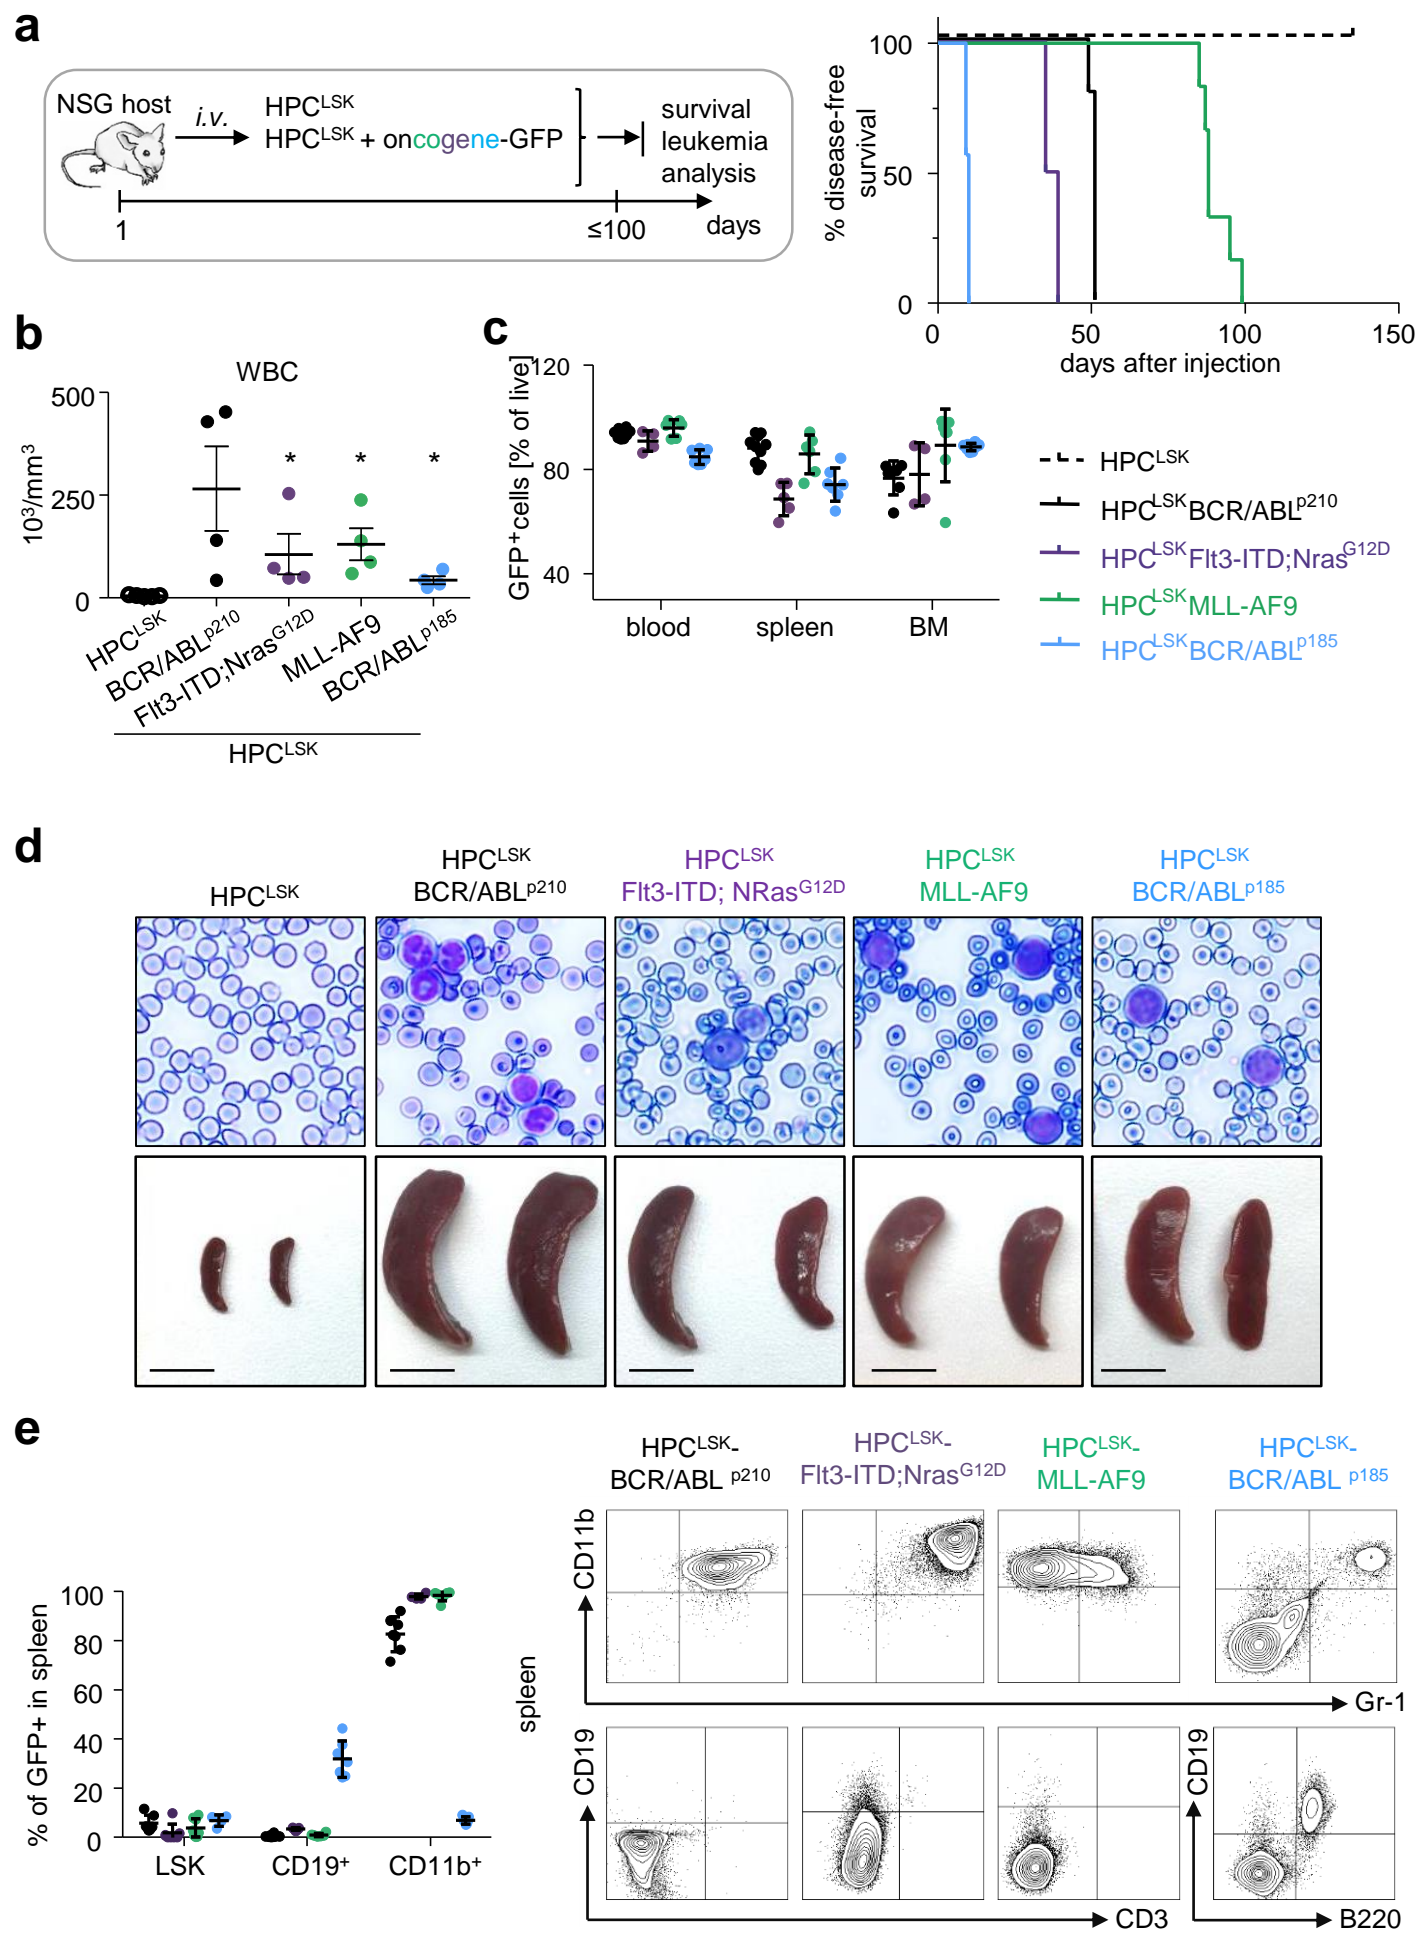

# Suppl. Figure 4

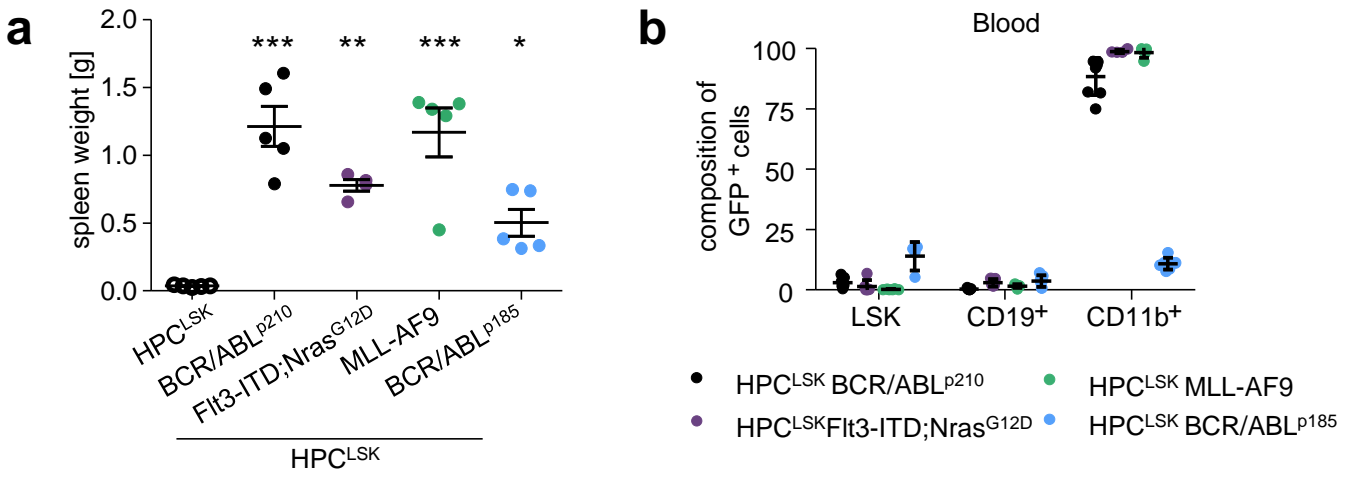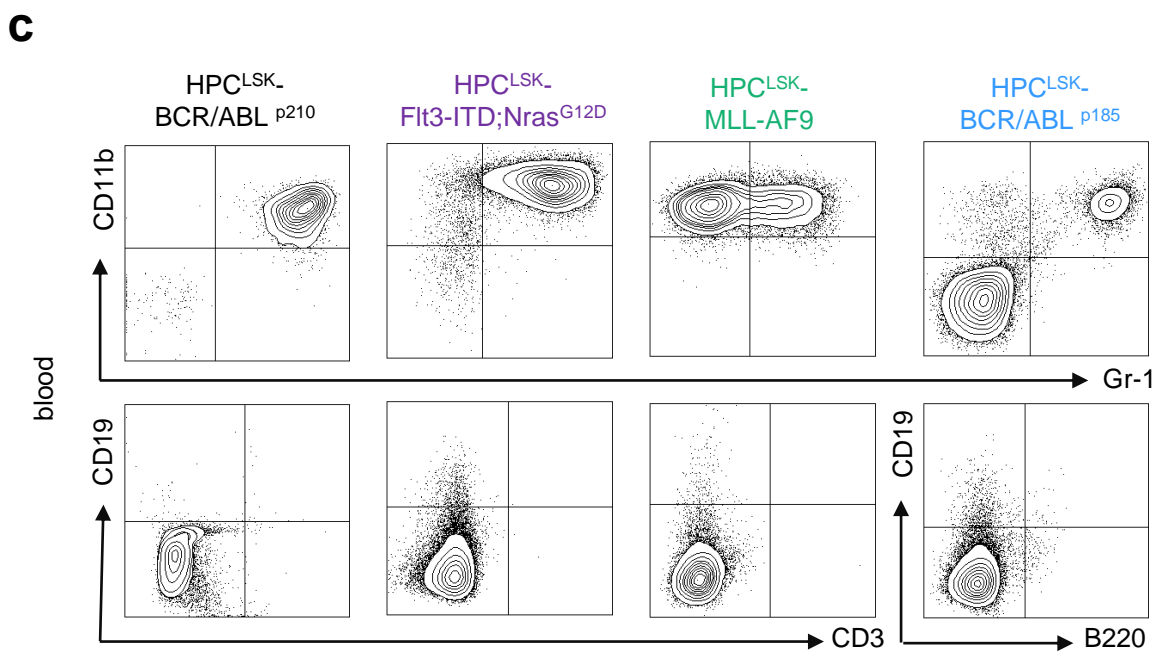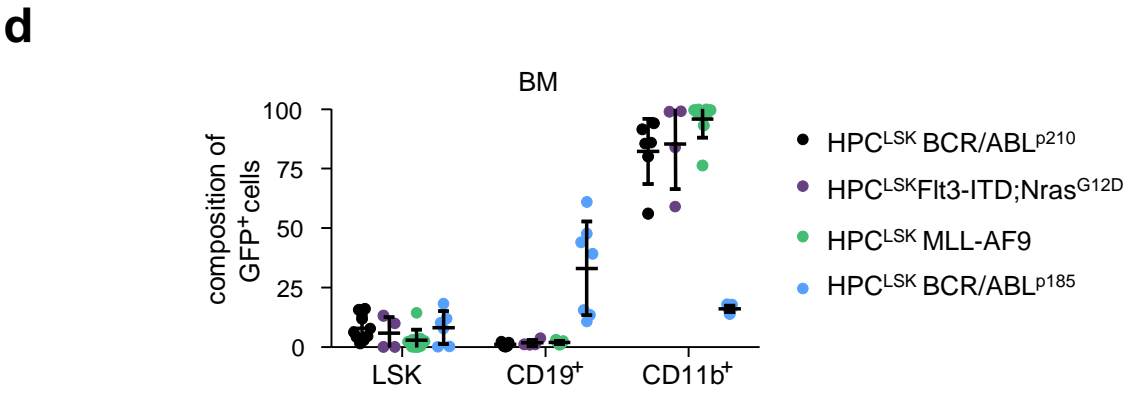



# Figure 5

**a**

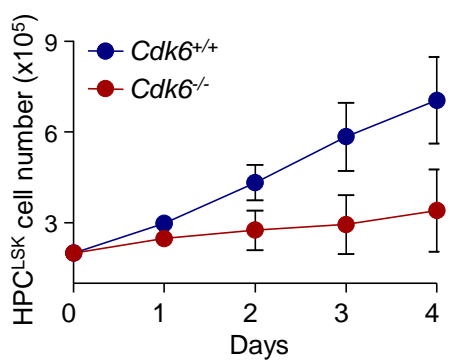

**b**

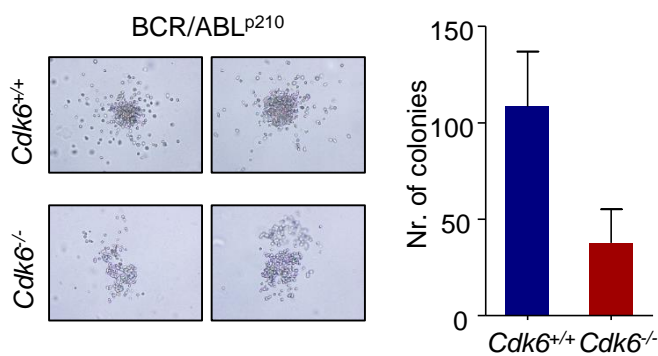

**c**

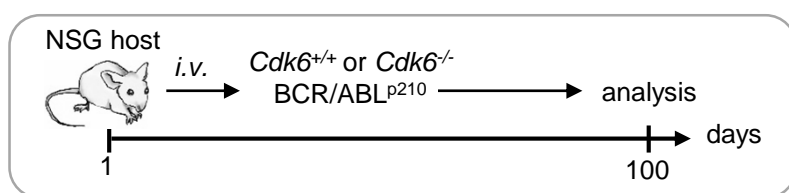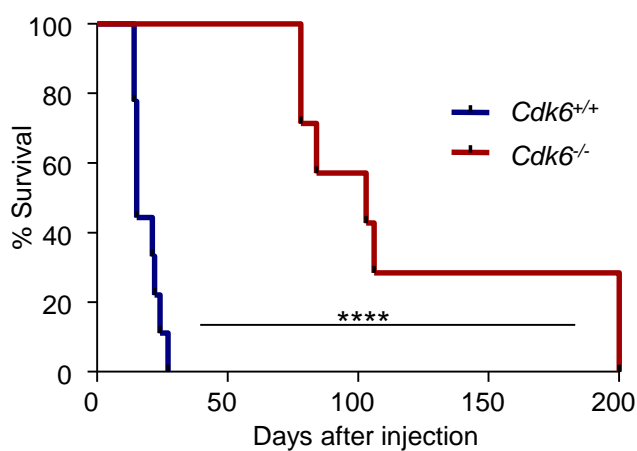

**d**

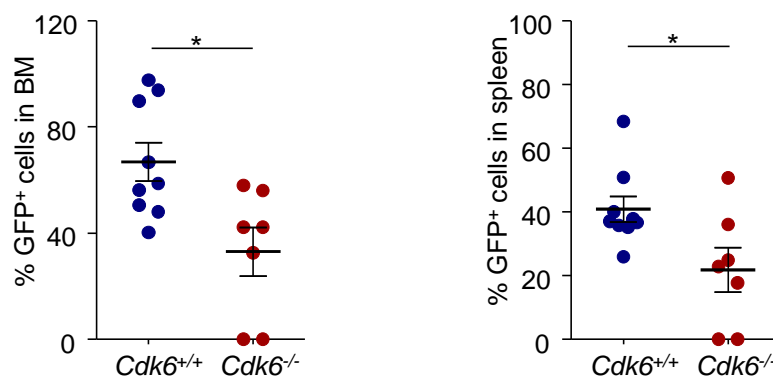

# Supp. Figure 5

**a**

HPC<sup>LSKs</sup> untransformed +SCF

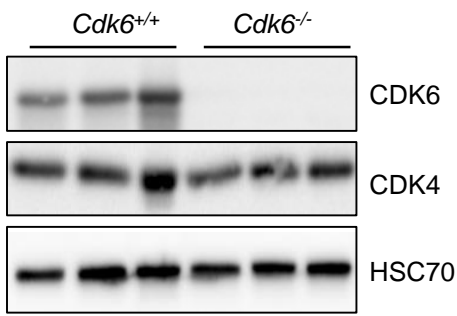

**b**

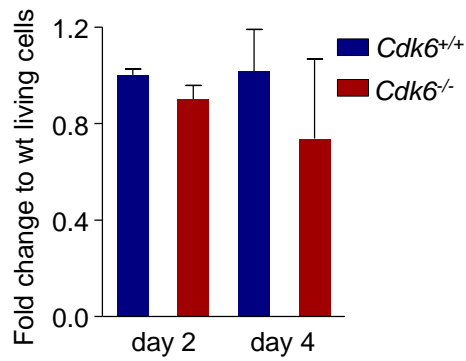

**c**

BCR/ABL<sup>p210</sup>  
cytokine-independent

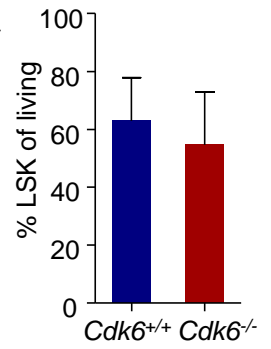

**d**

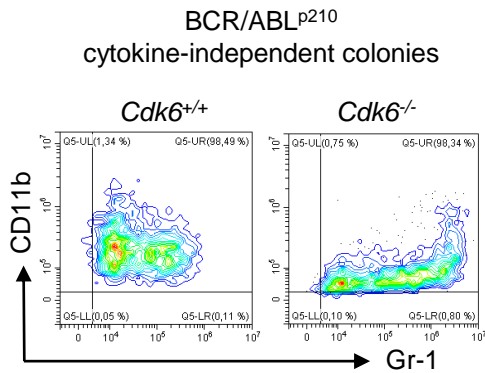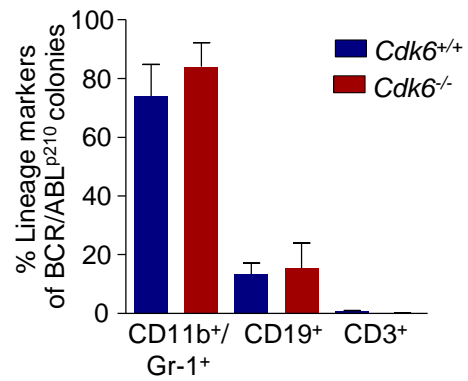

**e**

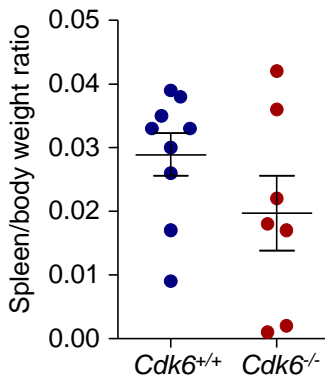

**f**

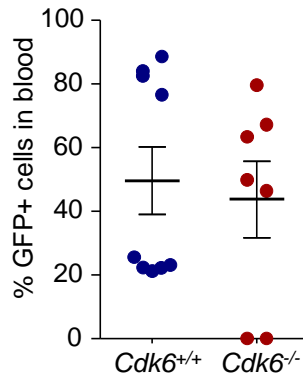

# Figure 6

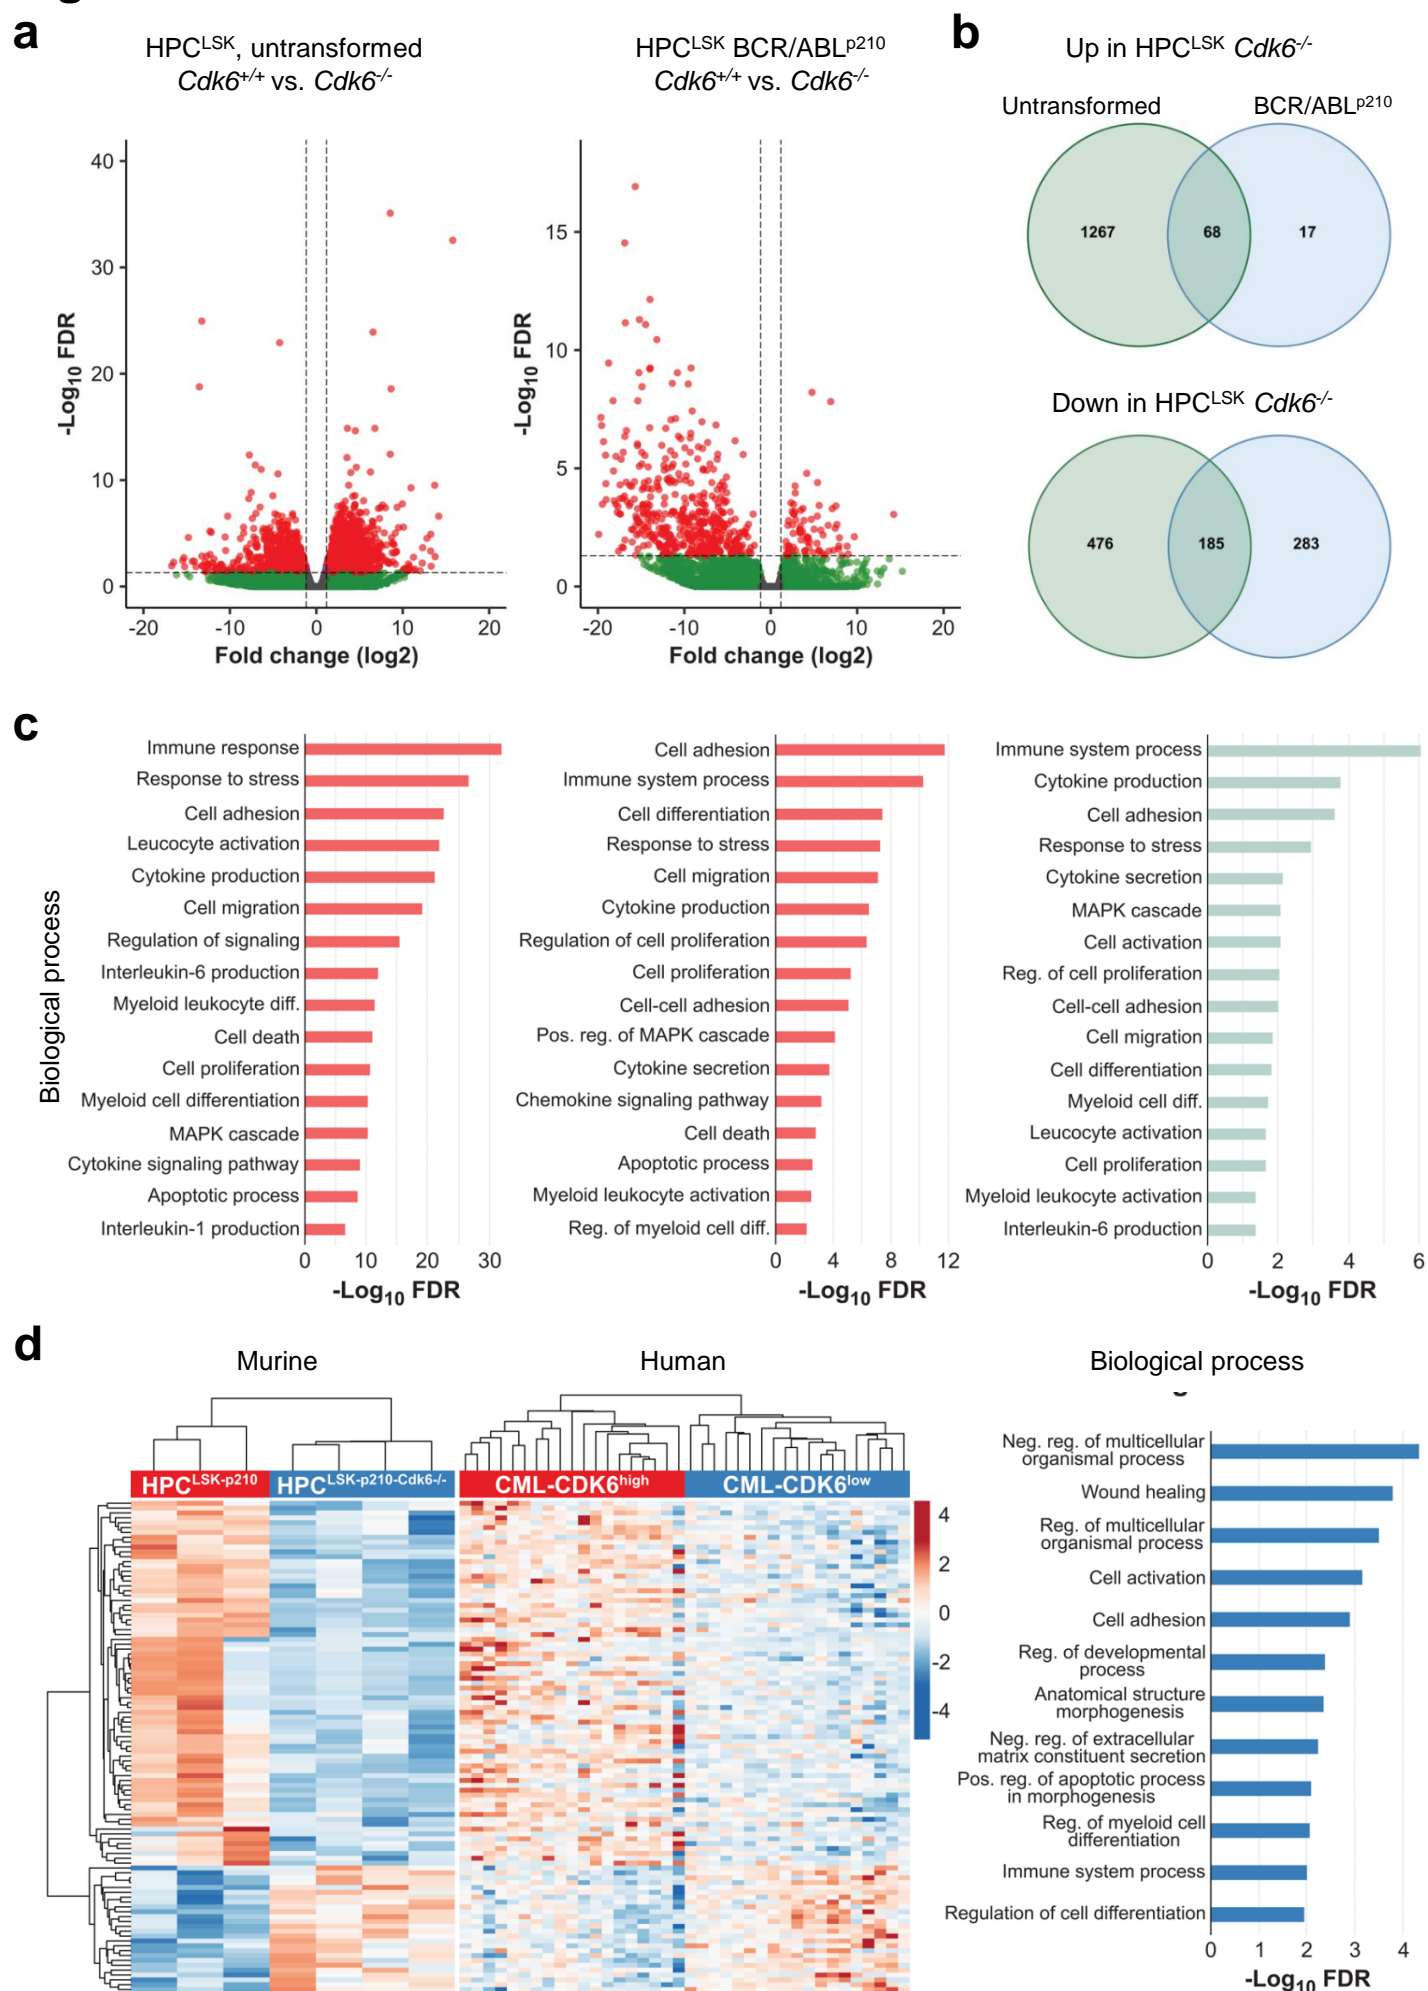

# Figure 7

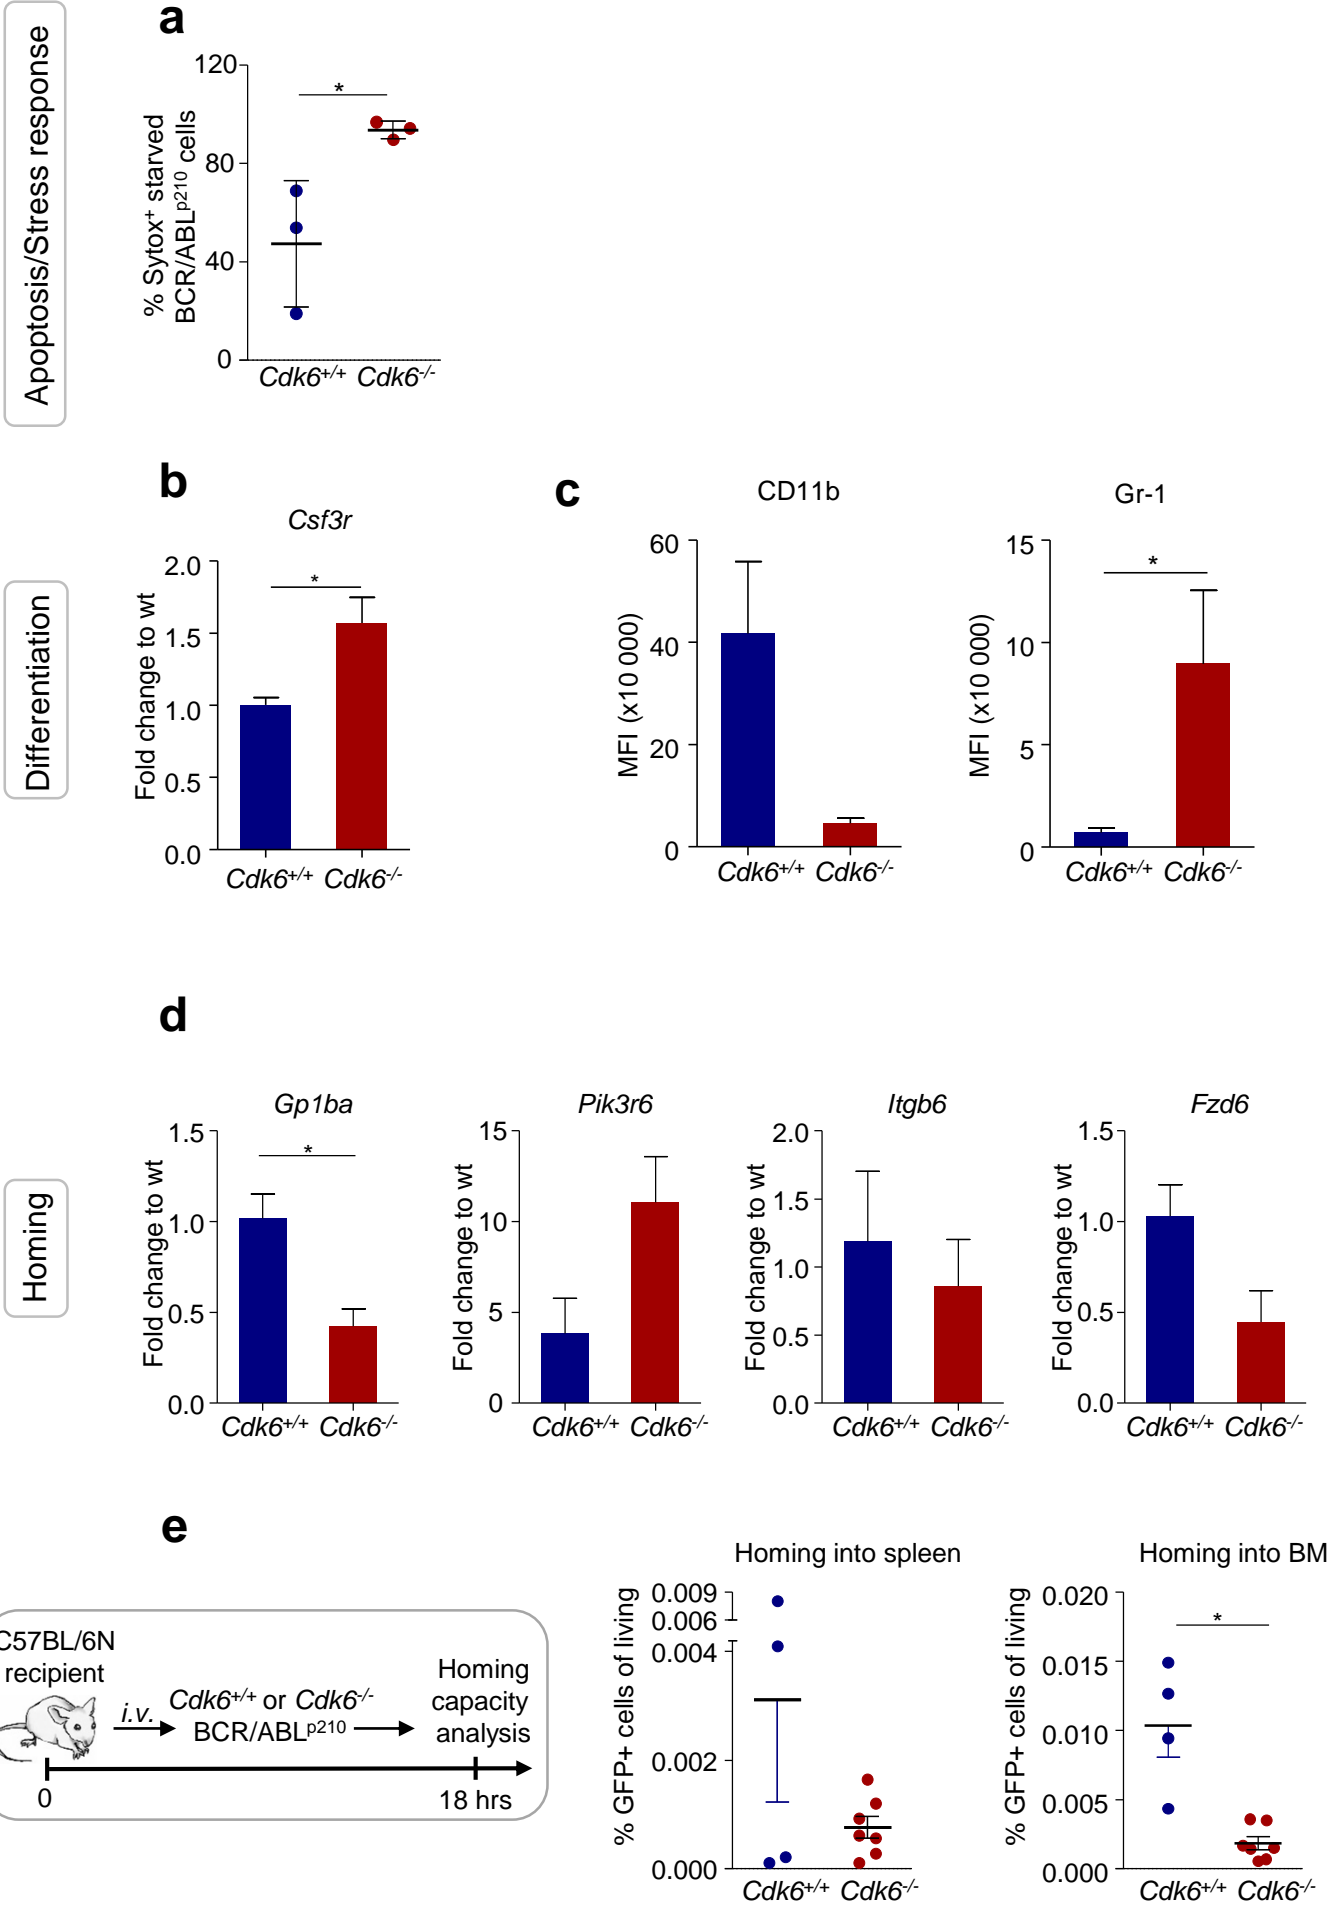

Source: https://www.biorxiv.org/content/10.1101/2020.10.05.325886v1.full.pdf
